# Supplementary material for: Gut microbiota and metabolites signatures of clinical response in anti-PD-1/PD-L1 based immunotherapy of biliary tract cancer
Source: PubMed Central journal article supplement (PMC11149318; doi:10.1186/s40364-024-00607-8), 2024-06-03
Supplement: 40364_2024_607_MOESM1_ESM.pdf [file 40364_2024_607_MOESM1_ESM.pdf]

## Supplemental material

### **Gut microbiota and metabolites signatures of clinical response in anti-PD-1/PD-L1 based immunotherapy of biliary tract cancer**

Chengpei Zhu<sup>1, 2, †</sup>; Yunchao Wang<sup>1, 4, †</sup>; Ruijuan Zhu<sup>3, †</sup>; Shanshan Wang<sup>1, †</sup>; Jingnan Xue<sup>1</sup>; Dongya Zhang<sup>3</sup>; Zhou Lan<sup>3</sup>; Chenchen Zhang<sup>3</sup>; Yajun Liang<sup>3</sup>; Nan Zhang<sup>1</sup>; Ziyu Xun<sup>1</sup>; Longhao Zhang<sup>1</sup>; Cong Ning<sup>1</sup>; Xu Yang<sup>1</sup>; Jiashuo Chao<sup>1</sup>; Junyu Long<sup>1</sup>; Xiaobo Yang<sup>1</sup>; Hanping Wang<sup>1, 5, \*</sup>; Xinting Sang<sup>1, \*</sup>; Xianzhi Jiang<sup>3, \*</sup>; Haitao Zhao<sup>1, \*</sup>

<sup>1</sup>Department of Liver Surgery, State Key Laboratory of Complex Severe and Rare Diseases, Peking Union Medical College Hospital, Chinese Academy of Medical Sciences and Peking Union Medical College (CAMS & PUMC), Beijing, China.

<sup>2</sup>Department of General Surgery Center, Beijing YouAn Hospital, Clinical Center for Liver Cancer, Capital Medical University, Beijing, China.

<sup>3</sup>Microbiome Research Center, Moon (Guangzhou) Biotech Ltd., Guangzhou, China.

<sup>4</sup>Organ Transplantation Center, The First Affiliated Hospital of Shandong First Medical University, Jinan, China.

<sup>5</sup>Division of Pulmonary and Critical Care Medicine, State Key Laboratory of Complex Severe and Rare Diseases, Chinese Academy of Medical Sciences & Peking Union Medical College (CAMS & PUMC), Beijing, China.

†These authors contributed equally.

**\*Corresponding author**

**Haitao Zhao**, Department of Liver Surgery, State Key Laboratory of Complex Severe and Rare Diseases, Peking Union Medical College Hospital, Chinese Academy of Medical Sciences and Peking Union Medical College (CAMS & PUMC), No. 1 Shuaifuyuan, Wangfujing, Beijing 100730, China. Email: zhaoh@pumch.cn. Tel.: +86 10 69156042.

**Xianzhi Jiang**, Microbiome Research Center, Moon (Guangzhou) Biotech Ltd., Guangzhou 510535, China. Email: jxz@moonbio.com. Tel.: +86 20 31603387.

**Xinting Sang**, Department of Liver Surgery, State Key Laboratory of Complex Severe and Rare Diseases, Peking Union Medical College Hospital, Chinese Academy of Medical Sciences and Peking Union Medical College (CAMS & PUMC), No. 1 Shuaifuyuan, Wangfujing, Beijing 100730, China. Email: sangxt@pumch.cn. Tel.: +86 10 69156042.

**Hanping Wang**, Division of Pulmonary and Critical Care Medicine, State Key Laboratory of Complex Severe and Rare Diseases, Chinese Academy of Medical Sciences & Peking Union Medical College (CAMS & PUMC), No. 1 Shuaifuyuan, Wangfujing, Beijing 100730, China. Email: wanghp@pumch.cn. Tel.: +86 10 69156042.

**Supplementary Table S1. Types of therapeutic regimen of the study population with 88 biliary tract cancer patients**

| Types of IM   | DCB | NDB | Types of MTT | DCB | NDB | Types of CHEMO | DCB | NDB |
|---------------|-----|-----|--------------|-----|-----|----------------|-----|-----|
| Toripalimab   | 32  | 22  | Lenvatinib   | 34  | 27  | Gemox          | 3   | 2   |
| Pembrolizumab | 8   | 7   | Axitinib     | 5   | 9   | GC             | 3   | 1   |
| Sintilimab    | 3   | 4   | Apatinib     | 5   | 5   | GS             | 1   | 1   |
| Camrelizumab  | 1   | 3   | Bevacizumab  | 1   | 0   |                |     |     |
| Tislelizumab  | 0   | 3   | Olaparib     | 1   | 0   |                |     |     |
| Nivolumab     | 1   | 0   | Surufatinib  | 1   | 0   |                |     |     |
| Durvalumab    | 2   | 1   |              |     |     |                |     |     |
| Envafolimab   | 0   | 1   |              |     |     |                |     |     |

DCB, durable clinical benefit; NDB, non-durable clinical benefit; IM, immunotherapy; MTT, molecular targeted therapy; CHEMO, chemotherapy; Gemox, Gemcitabine plus oxaliplatin; GC, Gemcitabine plus cisplatin; GS, Gemcitabine plus S-1.

**Supplementary Table S2. The influence of clinical factors to gut microbiota by PERMANOVA based on species**

| phenotype                  | SumsOfSqs   | MeanSqs     | F.Model     | R2          | Pr(>F)   |
|----------------------------|-------------|-------------|-------------|-------------|----------|
| Tsize <sup>#</sup>         | 0.902686464 | 0.902686464 | 2.542499868 | 0.028715022 | 1.00E-04 |
| Dbil                       | 0.739285599 | 0.739285599 | 2.071182185 | 0.023517138 | 0.0013   |
| Tbil                       | 0.713411566 | 0.713411566 | 1.997010243 | 0.022694069 | 0.0024   |
| Sex                        | 0.298741589 | 0.298741589 | 0.8251127   | 0.009503157 | 0.7497   |
| Age                        | 0.289102467 | 0.289102467 | 0.798242707 | 0.009196531 | 0.7875   |
| TNM                        | 0.664180369 | 0.332090184 | 0.917320895 | 0.021127994 | 0.6581   |
| Response                   | 0.605168254 | 0.302584127 | 0.834217559 | 0.019250782 | 0.8375   |
| Child Pugh                 | 0.380577192 | 0.380577192 | 1.053909371 | 0.012106399 | 0.3597   |
| Ecog                       | 0.80678245  | 0.403391225 | 1.119460997 | 0.025664256 | 0.2182   |
| Hepatitis                  | 0.377253127 | 0.377253127 | 1.044592428 | 0.012000658 | 0.3787   |
| CA199                      | 0.345265073 | 0.345265073 | 0.95503572  | 0.010983098 | 0.5392   |
| Intrahepatic<br>metastasis | 0.480265506 | 0.480265506 | 1.334253146 | 0.015277547 | 0.1006   |
| Vascular<br>invasion       | 0.427901005 | 0.427901005 | 1.186768796 | 0.013611799 | 0.2041   |
| Bile acids                 | 0.388612001 | 0.388612001 | 1.076438183 | 0.012361991 | 0.3321   |
| AFP                        | 0.339842198 | 0.339842198 | 0.939871603 | 0.010810593 | 0.581    |
| Therapeutic<br>regimen     | 0.348631243 | 0.348631243 | 0.964451282 | 0.011090178 | 0.501    |

<sup>#</sup>Maximum tumor diameter.



**Supplementary Table S3. Gut microbiome composition at the phylum level in the DCB and NDB group**

| Taxonomy                       | DCB         | NDB         |
|--------------------------------|-------------|-------------|
| p__Firmicutes                  | 0.432076704 | 0.520081905 |
| p__Bacteroidetes               | 0.345363002 | 0.251612927 |
| p__Proteobacteria              | 0.126575262 | 0.082768641 |
| p__Actinobacteria              | 0.050019664 | 0.1046037   |
| p__Verrucomicrobia             | 0.042843098 | 0.028175393 |
| p__Bacteria_unclassified       | 2.05E-05    | 0.007023163 |
| p__Synergistetes               | 0.002520647 | 0.002644073 |
| p__Fusobacteria                | 9.74E-05    | 0.001921056 |
| p__Candidatus_Saccharibacteria | 0.000166168 | 0.001111902 |
| p__Euryarchaeota               | 0.000152681 | 5.07E-05    |
| p__Lentisphaerae               | 0.000131419 | 5.33E-06    |
| p__Ascomycota                  | 2.74E-05    | 0           |
| p__Candidatus_Melainabacteria  | 4.75E-06    | 0           |
| p__Coprothermobacterota        | 1.26E-06    | 0           |
| p__Tenericutes                 | 0           | 1.20E-06    |
| others                         | 8.51E-09    | 5.42E-18    |

**Supplementary Table S4. Gut microbiome composition at the species level in the DCB and NDB group**

| Taxonomy                            | DCB    | NDB    |
|-------------------------------------|--------|--------|
| s_Faecalibacterium_prausnitzii      | 6.15%  | 6.59%  |
| s_Escherichia_coli                  | 7.76%  | 4.14%  |
| s_Bacteroides_uniformis             | 5.70%  | 2.89%  |
| s_Akkermansia_muciniphila           | 4.27%  | 2.82%  |
| s_Phocaeicola_vulgatus              | 3.93%  | 2.84%  |
| s_Klebsiella_pneumoniae             | 2.70%  | 2.03%  |
| s_Alistipes_putredinis              | 3.16%  | 1.44%  |
| s_Bifidobacterium_longum            | 0.82%  | 3.18%  |
| s_Alistipes_nderdonkii              | 2.31%  | 1.57%  |
| s_Bifidobacterium_adolescentis      | 0.70%  | 2.45%  |
| s_Bacteroides_thetaiotaomicron      | 1.53%  | 1.55%  |
| s_Gemmiger_formicilis               | 1.05%  | 1.67%  |
| s_Streptococcus_salivarius          | 1.09%  | 1.48%  |
| s_Parabacteroides_distasonis        | 0.76%  | 1.77%  |
| s_Bifidobacterium_pseudocatenulatum | 1.21%  | 1.25%  |
| s_Lachnospiraceae_bacterium         | 1.09%  | 1.18%  |
| s_Fusicatenibacter_saccharivorans   | 1.00%  | 1.26%  |
| s_Clostridia_bacterium              | 1.34%  | 0.89%  |
| s_Alistipes_shahii                  | 1.54%  | 0.67%  |
| s_Blautia_wexlerae                  | 1.18%  | 1.01%  |
| others                              | 50.69% | 57.35% |

**Supplementary Table S5. Gut microbiome composition at the genus level in the DCB and NDB group**

| Taxonomy                       | DCB         | NDB         |
|--------------------------------|-------------|-------------|
| g_Bacteroides                  | 0.125536177 | 0.094814824 |
| g_Faecalibacterium             | 0.073911717 | 0.076038117 |
| g_Alistipes                    | 0.086952694 | 0.046217273 |
| g_Bifidobacterium              | 0.036011857 | 0.08480621  |
| g_Escherichia                  | 0.077634753 | 0.041351288 |
| g_Phocaecicola                 | 0.072578891 | 0.037255766 |
| g_Akkermansia                  | 0.042742091 | 0.028172415 |
| g_Prevotella                   | 0.029565219 | 0.038994032 |
| g_Klebsiella                   | 0.029520696 | 0.023315166 |
| g_Blautia                      | 0.023673466 | 0.023325332 |
| g_Ruminococcaceae_unclassified | 0.02515784  | 0.020887822 |
| g_Lachnospiraceae_unclassified | 0.021461421 | 0.020081276 |
| g_Streptococcus                | 0.014259055 | 0.025542085 |
| g_Clostridia_unclassified      | 0.017642172 | 0.019299578 |
| g_Parabacteroides              | 0.011124081 | 0.023816254 |
| g_Dialister                    | 0.008743596 | 0.02380158  |
| g_Gemmiger                     | 0.012928864 | 0.018651473 |
| g_Roseburia                    | 0.017987883 | 0.013477876 |
| g_Ruminococcus                 | 0.017537264 | 0.012476839 |
| g_Veillonella                  | 0.01362396  | 0.011346351 |
| others                         | 0.241406302 | 0.316328444 |

**Supplementary Table S6. Gut microbiome composition at the class level in the DCB and NDB group**

| Taxonomy                   | DCB         | NDB         |
|----------------------------|-------------|-------------|
| c__Clostridia              | 0.368674198 | 0.383514929 |
| c__Bacteroidia             | 0.344544055 | 0.251105027 |
| c__Gammaproteobacteria     | 0.113991119 | 0.067408    |
| c__Actinobacteria          | 0.038948111 | 0.088132963 |
| c__Negativicutes           | 0.035788228 | 0.060328688 |
| c__Bacilli                 | 0.020364704 | 0.067864024 |
| c__Verrucomicrobiae        | 0.042742091 | 0.028172415 |
| c__Coriobacteria           | 0.01105846  | 0.016467471 |
| c__Betaproteobacteria      | 0.008132068 | 0.009812266 |
| c__Deltaproteobacteria     | 0.004089538 | 0.004995915 |
| c__Bacteria_unclassified   | 2.05E-05    | 0.007023163 |
| c__CFGB1340                | 0.002918581 | 0.003137671 |
| c__Synergistia             | 0.002520647 | 0.002644073 |
| c__Erysipelotrichia        | 0.001185026 | 0.003657461 |
| c__Fusobacteriia           | 9.74E-05    | 0.001921056 |
| c__Firmicutes_unclassified | 0.001177991 | 0.000143576 |
| c__CFGB540                 | 0.000732551 | 0           |
| c__CFGB3035                | 0.000570053 | 0.000127124 |
| c__CFGB3053                | 0.000389662 | 0.000300444 |
| c__CFGB42691               | 0.00020876  | 0.000390717 |
| others                     | 0.001846202 | 0.002853017 |

**Supplementary Table S7. Gut microbiome composition at the order level in the DCB and NDB group**

| Taxonomy                   | DCB         | NDB         |
|----------------------------|-------------|-------------|
| o__Clostridiales           | 0.337162453 | 0.349073237 |
| o__Bacteroidales           | 0.344536043 | 0.251044241 |
| o__Enterobacterales        | 0.109863645 | 0.066249117 |
| o__Bifidobacteriales       | 0.036055768 | 0.084991846 |
| o__Veillonellales          | 0.027751349 | 0.054705727 |
| o__Lactobacillales         | 0.019692304 | 0.061734366 |
| o__Verrucomicrobiales      | 0.042742091 | 0.028172415 |
| o__Clostridia_unclassified | 0.031508194 | 0.034441593 |
| o__Burkholderiales         | 0.008031789 | 0.009789859 |
| o__Coriobacteriales        | 0.006438821 | 0.009416417 |
| o__Acidaminococcales       | 0.007508321 | 0.004390583 |
| o__Eggerthellales          | 0.004567198 | 0.007041076 |
| o__Desulfovibrionales      | 0.004089538 | 0.004995915 |
| o__Bacteria_unclassified   | 2.05E-05    | 0.007023163 |
| o__Bacilli_unclassified    | 0.000667181 | 0.006088656 |
| o__OFGB1340                | 0.002918581 | 0.003137671 |
| o__Synergistales           | 0.002520647 | 0.002644073 |
| o__Erysipelotrichales      | 0.001185026 | 0.003657461 |
| o__Pasteurellales          | 0.003262009 | 0.000705585 |
| o__Micrococcales           | 0.00188803  | 0.001057668 |
| others                     | 0.007590485 | 0.009639332 |

**Supplementary Table S8. Gut microbiome composition at the family level in the DCB and NDB group**

| Taxonomy                      | DCB         | NDB         |
|-------------------------------|-------------|-------------|
| f__Ruminococcaceae            | 0.185450219 | 0.179243429 |
| f__Lachnospiraceae            | 0.11486557  | 0.131643707 |
| f__Bacteroidaceae             | 0.126096662 | 0.09589199  |
| f__Enterobacteriaceae         | 0.109762747 | 0.065894034 |
| f__Rikenellaceae              | 0.087789464 | 0.046375851 |
| f__Bifidobacteriaceae         | 0.036055768 | 0.084991846 |
| f__Bacteroidales_unclassified | 0.07978326  | 0.038721793 |
| f__Veillonellaceae            | 0.027751349 | 0.054705727 |
| f__Prevotellaceae             | 0.03361224  | 0.040890395 |
| f__Akkermansiaceae            | 0.042742091 | 0.028172415 |
| f__Clostridia_unclassified    | 0.031508194 | 0.034441593 |
| f__Clostridiaceae             | 0.021427472 | 0.020394122 |
| f__Streptococcaceae           | 0.014261613 | 0.026108995 |
| f__Tannerellaceae             | 0.011129991 | 0.023817193 |
| f__Lactobacillaceae           | 0.004835028 | 0.029694034 |
| f__Oscillospiraceae           | 0.01066176  | 0.009400473 |
| f__Coriobacteriaceae          | 0.006315132 | 0.008286276 |
| f__Sutterellaceae             | 0.007221645 | 0.007002561 |
| f__Acidaminococcaceae         | 0.007508321 | 0.004390583 |
| f__Eggerthellaceae            | 0.004567198 | 0.007041076 |
| others                        | 0.036654277 | 0.062891907 |

**Supplementary Table S9. Summary of 24 significantly differential metabolites**

| id   | Name                                                       | Mean.DCB | Mean.NDB | VIP   | P.value | FDR   | Fold.Change | Log2.Fold.Change |
|------|------------------------------------------------------------|----------|----------|-------|---------|-------|-------------|------------------|
| 6    | Mesylate                                                   | 2.633    | 1.419    | 1.775 | 0.030   | 0.905 | 1.856       | 0.892            |
| 194  | Tyramine                                                   | 0.004    | 0.008    | 2.013 | 0.043   | 0.905 | 0.476       | -1.071           |
| 242  | Dopamine                                                   | 0.184    | 0.088    | 1.024 | 0.047   | 0.905 | 2.089       | 1.063            |
| 312  | N-Methyl proline                                           | 0.030    | 0.144    | 1.482 | 0.020   | 0.905 | 0.206       | -2.277           |
| 379  | Pyrrolidine                                                | 0.103    | 0.168    | 2.615 | 0.010   | 0.905 | 0.615       | -0.701           |
| 394  | Tryptamine                                                 | 0.060    | 0.308    | 2.690 | 0.029   | 0.905 | 0.194       | -2.367           |
| 441  | 4-Acetyl-2-methylpyrimidine                                | 0.024    | 0.012    | 1.130 | 0.048   | 0.905 | 1.915       | 0.937            |
| 463  | Thymine                                                    | 0.046    | 0.023    | 2.074 | 0.024   | 0.905 | 1.966       | 0.975            |
| 491  | 2-Azetidinecarboxylic acid                                 | 0.039    | 0.060    | 1.940 | 0.035   | 0.905 | 0.649       | -0.625           |
| 492  | LysoPE(15:0/0:0)                                           | 1.269    | 0.640    | 1.984 | 0.027   | 0.905 | 1.982       | 0.987            |
| 575  | 3-Ethyl-2-methoxypyrazine                                  | 0.052    | 0.114    | 2.297 | 0.035   | 0.905 | 0.456       | -1.134           |
| 620  | (2S,2'S)-Pyrosaccharopine                                  | 0.109    | 0.024    | 1.817 | 0.038   | 0.905 | 4.568       | 2.192            |
| 627  | Harmanine                                                  | 0.121    | 0.052    | 1.753 | 0.035   | 0.905 | 2.335       | 1.223            |
| 670  | Picolinic acid                                             | 0.016    | 0.012    | 2.446 | 0.030   | 0.905 | 1.363       | 0.447            |
| 675  | 4-((Hydroxymethyl)nitrosoamino)-1-(3-pyridinyl)-1-butanone | 0.093    | 0.012    | 2.505 | 0.004   | 0.905 | 7.544       | 2.915            |
| 799  | Pyrimidine                                                 | 0.051    | 0.034    | 2.735 | 0.021   | 0.905 | 1.491       | 0.577            |
| 826  | 1,2,3,4,5,6-Hexahydro-7H-cyclopenta(b)pyridin-7-one        | 0.002    | 0.004    | 2.362 | 0.026   | 0.905 | 0.495       | -1.015           |
| 864  | 4-(2,6,6-Trimethyl-1,3-cyclohexadien-1-yl)-2-butanone      | 0.045    | 0.056    | 2.209 | 0.034   | 0.905 | 0.800       | -0.322           |
| 874  | Ectoine                                                    | 0.088    | 0.167    | 1.472 | 0.026   | 0.905 | 0.527       | -0.923           |
| 929  | 4-Methoxytyramine                                          | 0.024    | 0.012    | 1.644 | 0.032   | 0.905 | 1.925       | 0.945            |
| 972  | 5-Methylquinoxaline                                        | 0.012    | 0.058    | 2.502 | 0.028   | 0.905 | 0.208       | -2.264           |
| 1013 | 2,5-Dimethylpyrazine                                       | 0.038    | 0.013    | 2.371 | 0.009   | 0.905 | 2.940       | 1.556            |
| 1040 | Formylfusarochromanone                                     | 0.076    | 0.267    | 2.167 | 0.022   | 0.905 | 0.286       | -1.805           |
| 1044 | Threoninyl-Tryptophan                                      | 0.010    | 0.023    | 2.593 | 0.003   | 0.905 | 0.444       | -1.171           |

**Supplementary Table S10. Dynamic microbial composition in the DCB and NDB group at the species level**

|                                 | DCB_P1     | DCB_P2     | DCB_P3     | DCB_P4     | DCB_P5     | DCB_P6     | NDB_P1     | NDB_P2     | NDB_P3     | NDB_P4     | NDB_P5     | NDB_P6     |
|---------------------------------|------------|------------|------------|------------|------------|------------|------------|------------|------------|------------|------------|------------|
| s__Faecalibacterium_prausnitzii | 0.06196971 | 0.05089991 | 0.13206152 | 0.10984623 | 0.06170045 | 0.14292114 | 0.07949908 | 0.07447635 | 0.06134782 | 0.020588   | 0.0187911  | 0.00190043 |
|                                 | 7          | 4          | 5          | 3          |            | 3          | 3          |            |            |            |            | 3          |
| s__Klebsiella_pneumoniae        | 0.00845911 | 0.01667794 | 0.00013052 | 0.03209185 | 0.06621707 | 0.01200702 | 0.0019175  | 0.05252093 | 0.00134888 | 0.0018536  | 0.07470756 | 0.3150445  |
|                                 | 7          | 3          | 5          |            | 5          | 9          |            | 3          |            |            | 7          |            |
| s__Akkermansia_muciniphila      | 0.00347933 | 0.06655092 | 0.15310077 | 0.02841735 | 0.01889232 | 0.01615    | 0.06727296 | 0.03805905 | 0.00883916 | 0.00721562 |            | 0.16790273 |
|                                 | 3          | 9          | 5          |            | 5          |            | 7          |            |            | 5          | 0          | 3          |
| s__Bacteroides_uniformis        | 0.05128013 | 0.07344542 | 0.18937967 | 0.0460699  | 0.0634861  | 0.02364834 | 0.03816771 | 0.02368168 |            | 0.00139432 | 0.00796503 | 0.01535426 |
|                                 | 3          | 9          | 5          |            |            | 3          | 7          | 3          | 0.0319387  |            | 5          | 3          |
| s__bacterium_OL_1               | 0          | 0          | 3.00E-07   | 6.08E-06   | 0          | 4.71E-05   | 0.00150556 | 0.04633425 | 0.145862   | 0.1580957  | 0.1393175  | 0          |
|                                 |            |            |            |            |            |            | 7          |            |            |            |            |            |
| s__Citrobacter_freundii         | 2.73E-05   | 5.34E-05   | 8.05E-06   | 2.63E-05   | 2.99E-05   | 7.76E-06   | 0.00015871 | 0.0004387  | 9.28E-06   | 1.00E-05   | 0.2784671  | 0.18646356 |
|                                 |            |            |            |            |            |            | 7          |            |            |            |            | 7          |
| s__Escherichia_coli             | 0.03655388 | 0.10104081 | 0.00085772 | 0.08328611 | 0.03552827 | 0.01318838 | 0.04489553 | 0.01074418 |            | 0.01658972 | 0.0269629  | 0.01636746 |
|                                 | 3          | 4          | 5          | 7          | 5          | 6          | 3          | 3          | 0.00668624 |            | 5          | 7          |
| s__Alistipes_nderdonkii         | 0.01656003 | 0.12402561 | 0.02678147 | 0.09043138 | 0.0338129  | 0.02624592 | 0.02628501 | 0.01845923 |            |            |            |            |
|                                 | 3          | 4          | 5          | 3          |            | 9          | 7          | 3          | 0.00889428 | 0.0034005  | 2.88E-05   | 0          |
| s__Parabacteroides_distasoni    | 0.00686138 | 0.00581847 | 0.00337002 | 0.00782631 | 0.00325965 | 0.00113491 | 0.01297631 | 0.08326136 |            | 0.06270252 | 0.05215086 | 0.01445036 |
|                                 | 3          | 1          | 5          | 7          |            | 4          | 7          | 7          | 0.06310392 |            | 5          | 7          |
| s__Bifidobacterium_adolescentis | 0.03136556 | 0.00064192 | 0.00987252 | 0.01983441 | 0.00063117 | 0.00445185 | 0.00364488 |            | 0.06453535 | 0.06232776 | 0.08545082 | 0.00547663 |
|                                 | 7          | 9          | 5          | 7          | 5          | 7          | 3          |            |            |            | 5          | 3          |
| others                          | 0.78344351 | 0.56084554 | 0.4844374  | 0.5821641  | 0.71644215 | 0.7601975  | 0.7236767  | 0.5874889  | 0.60964196 | 0.64269917 | 0.39613246 | 0.2825013  |
|                                 | 7          | 3          |            |            |            |            |            |            |            | 5          | 7          |            |



**Supplementary Table S11. Dynamic microbial composition in the DCB and NDB group at the phylum level**

|                                    | DCB_P1          | DCB_P2          | DCB_P3          | DCB_P4          | DCB_P5          | DCB_P6          | NDB_P1          | NDB_P2          | NDB_P3     | NDB_P4          | NDB_P5          | NDB_P6          |
|------------------------------------|-----------------|-----------------|-----------------|-----------------|-----------------|-----------------|-----------------|-----------------|------------|-----------------|-----------------|-----------------|
| p__Firmicutes                      | 0.58803088<br>3 | 0.344913        | 0.3934753       | 0.44056535      | 0.41677062<br>5 | 0.6549675       | 0.5767941       | 0.46454183<br>3 | 0.35868348 | 0.29865812<br>5 | 0.136947        | 0.16929873<br>3 |
| p__Bacteroidetes                   | 0.28586063<br>3 | 0.43931177<br>1 | 0.40861127<br>5 | 0.35405728<br>3 | 0.33593027<br>5 | 0.21943581<br>4 | 0.24140655      | 0.28522123<br>3 | 0.2840701  | 0.3427092       | 0.13049256<br>7 | 0.06046336<br>7 |
| p__Proteobacteria                  | 0.05557326<br>7 | 0.12587628<br>6 | 0.016085        | 0.12198635      | 0.14006922<br>5 | 0.03960802<br>9 | 0.07614511<br>7 | 0.07847683<br>3 | 0.1150367  | 0.02968652<br>5 | 0.40864093<br>3 | 0.58705876<br>7 |
| p__Actinobacteria                  | 0.06668228<br>3 | 0.02222661<br>4 | 0.02872735      | 0.04630931<br>7 | 0.0881666       | 0.0690537       | 0.02728566<br>7 | 0.08617423<br>3 | 0.08324964 | 0.1589978       | 0.18447306<br>7 | 0.01301843<br>3 |
| p__Verrucomicrobia                 | 0.00347933<br>3 | 0.06655092<br>9 | 0.15310077<br>5 | 0.02841735      | 0.01889232<br>5 | 0.01615         | 0.06727296<br>7 | 0.03805905      | 0.00883916 | 0.00721562<br>5 | 0               | 0.16790273<br>3 |
| p__Bacteria_unclassified           | 0               | 0               | 3.00E-07        | 6.08E-06        | 0               | 4.71E-05        | 0.00150556<br>7 | 0.04633425      | 0.145862   | 0.1580957       | 0.1393175       | 0               |
| p__Synergistetes                   | 0               | 0.00097154<br>3 | 0               | 0.0086576       | 8.37E-05        | 0.00028192<br>9 | 0.0050515       | 0.00064078<br>3 | 0.00392816 | 0.0004698       | 9.77E-06        | 0.00221633<br>3 |
| p__Fusobacteria                    | 0               | 7.74E-06        | 0               | 0               | 0               | 5.17E-06        | 0.00380275      | 0.00016903<br>3 | 0.00025154 | 0.0033024       | 0               | 0               |
| p__Candidatus_Saccharibact<br>eria | 9.20E-05        | 8.04E-06        | 0               | 6.33E-07        | 5.12E-05        | 0.0004393       | 0.00051291<br>7 | 0.00016573<br>3 | 3.62E-05   | 0.00078977<br>5 | 3.02E-05        | 3.61E-05        |
| p__Euryarchaeota                   | 7.66E-05        | 0.0001311       | 0               | 0               | 0               | 0               | 0.00022285      | 0.00021701<br>7 | 4.31E-05   | 7.51E-05        | 8.90E-05        | 0               |
| others                             | 0.00020501<br>7 | 2.97E-06        | 0               | 3.33E-08        | 3.61E-05        | 1.14E-05        | 1.67E-08        | 0               | -6.00E-08  | 0               | -3.33E-08       | 5.57E-06        |

**Supplementary Table S12. Quantity summary of differential enriched metabolites from Point 1 to Point 6**

|                                    | P1    | P2    | P3    | P4    | P5    | P6    |
|------------------------------------|-------|-------|-------|-------|-------|-------|
| Detected metabolites               | 25160 | 25042 | 24673 | 25272 | 25148 | 25136 |
| Metabolites with name              | 1047  | 1045  | 1042  | 1047  | 1047  | 1048  |
| Differential metabolites           | 518   | 442   | 646   | 1319  | 1272  | 806   |
| Differential metabolites with name | 30    | 15    | 26    | 45    | 50    | 43    |

**Supplementary Table S13. 20 survival associated differential taxa**

| Item                                        | DCB_fre | NDB_fr<br>e | DCB_mean    | NDB_mean    | wilcox.pvalu<br>e | BH-pvalue   | FDR-pvalue  | Enriched_gr<br>oup | LDA_score   | LEfSe_pvalue |
|---------------------------------------------|---------|-------------|-------------|-------------|-------------------|-------------|-------------|--------------------|-------------|--------------|
| p__Fusobacteria                             | 0.085   | 0.317       | 9.74E-05    | 0.001921056 | 0.005238702       | 0.039290269 | 0.039290269 | NDB                | 3.036855752 | 0.005141265  |
| c__CFGB3035                                 | 0.319   | 0.146       | 0.000570053 | 0.000127124 | 0.037386997       | 0.249246646 | 0.249246646 | DCB                | 2.431935943 | 0.036878352  |
| c__Fusobacteriia                            | 0.085   | 0.317       | 9.74E-05    | 0.001921056 | 0.005238702       | 0.10477405  | 0.10477405  | NDB                | 3.004468363 | 0.005141265  |
| c__Bacilli                                  | 0.979   | 1           | 0.020364704 | 0.067864024 | 7.60E-05          | 0.006083373 | 0.006083373 | NDB                | 4.386463023 | 7.47E-05     |
| o__OFGB3035                                 | 0.319   | 0.146       | 0.000570053 | 0.000127124 | 0.037386997       | 0.269186378 | 0.269186378 | DCB                | 2.315396638 | 0.036878352  |
| o__Fusobacteriales                          | 0.085   | 0.317       | 9.74E-05    | 0.001921056 | 0.005238702       | 0.141444967 | 0.141444967 | NDB                | 3.025622052 | 0.005141265  |
| o__Lactobacillales                          | 0.957   | 1           | 0.019692304 | 0.061734366 | 3.34E-05          | 0.003607218 | 0.003607218 | NDB                | 4.31946158  | 3.28E-05     |
| f__FGB3035                                  | 0.319   | 0.146       | 0.000570053 | 0.000127124 | 0.037386997       | 0.270610644 | 0.270610644 | DCB                | 2.455398218 | 0.036878352  |
| f__Clostridiales_Family_XIII_Incertae_Sedis | 0.362   | 0.561       | 0.000272379 | 0.000869827 | 0.02232908        | 0.231857149 | 0.231857149 | NDB                | 2.579617765 | 0.022062371  |
| f__Fusobacteriaceae                         | 0.085   | 0.317       | 9.74E-05    | 0.00186661  | 0.005238702       | 0.132713797 | 0.132713797 | NDB                | 2.995225234 | 0.005141265  |
| g__Alistipes                                | 0.957   | 0.854       | 0.086952694 | 0.046217273 | 0.032179221       | 0.498290357 | 0.498290357 | DCB                | 4.286598894 | 0.031844172  |
| g__GGB9615                                  | 0.681   | 0.415       | 0.004247255 | 0.002197244 | 0.023908403       | 0.475339049 | 0.475339049 | DCB                | 3.030550162 | 0.023637223  |
| g__Lacticaseibacillus                       | 0.043   | 0.195       | 2.37E-05    | 0.000513602 | 0.024185549       | 0.475339049 | 0.475339049 | NDB                | 2.432784865 | 0.02371232   |
| g__Fusobacterium                            | 0.085   | 0.317       | 9.74E-05    | 0.00186661  | 0.005238702       | 0.281177118 | 0.281177118 | NDB                | 2.911359731 | 0.005141265  |
| g__Streptococcus                            | 0.83    | 1           | 0.014259055 | 0.025542085 | 0.001960739       | 0.125242219 | 0.125242219 | NDB                | 3.783228299 | 0.00193325   |
| g__Limosilactobacillus                      | 0.404   | 0.732       | 0.001776996 | 0.0190409   | 0.000145078       | 0.048766495 | 0.048766495 | NDB                | 3.951479529 | 0.000142537  |
| s__Clostridium_sp_AF34_10BH                 | 0.723   | 0.39        | 0.001740043 | 0.000427022 | 0.000796387       | 0.218807325 | 0.218807325 | DCB                | 2.856789832 | 0.000783925  |
| s__Streptococcus_anginosus                  | 0.511   | 0.707       | 0.000482502 | 0.003659902 | 0.007019072       | 0.382413998 | 0.382413998 | NDB                | 3.187304016 | 0.006928563  |
| s__Bifidobacterium_dentium                  | 0.383   | 0.61        | 0.001166983 | 0.008842222 | 0.004978221       | 0.382413998 | 0.382413998 | NDB                | 3.619869795 | 0.004841233  |
| s__Streptococcus_salivarius                 | 0.787   | 0.902       | 0.010945813 | 0.014799329 | 0.021644098       | 0.517105725 | 0.517105725 | NDB                | 3.689939643 | 0.021405934  |

**Supplementary Table S14. Clinical characteristics of the study population in train and test sets.**

| Characteristic          | Train set (n=36) |           |           | Test set (n=18) |          |          |
|-------------------------|------------------|-----------|-----------|-----------------|----------|----------|
|                         | No. of patients  | DCB (%)   | NDB (%)   | No. of patients | DCB (%)  | NDB (%)  |
| Pathology               |                  |           |           |                 |          |          |
| ICC                     | 20               | 7 (35.0)  | 13 (81.3) | 14              | 6 (66.7) | 8 (88.9) |
| GBC                     | 8                | 7 (35.0)  | 1 (6.2)   | 1               | 0        | 1 (11.1) |
| ECC                     | 8                | 6 (30.0)  | 2 (12.5)  | 3               | 3 (33.3) | 0        |
| Response                |                  |           |           |                 |          |          |
| Partial response        | 12               | 12 (60.0) | NA        | 4               | 4 (44.4) | NA       |
| Stable disease          | 16               | 8 (40.0)  | 8 (50.0)  | 8               | 5 (55.6) | 3 (33.3) |
| Progressive disease     | 8                | NA        | 8 (50.0)  | 6               | NA       | 6 (66.7) |
| Sex                     |                  |           |           |                 |          |          |
| Female                  | 13               | 8 (40.0)  | 5 (31.3)  | 7               | 4 (44.4) | 3 (33.3) |
| Male                    | 23               | 12 (60.0) | 11 (68.7) | 11              | 5 (55.6) | 6 (66.7) |
| Age, y                  |                  |           |           |                 |          |          |
| ≥ 60                    | 21               | 10 (50.0) | 11 (68.7) | 11              | 6 (66.7) | 5 (55.6) |
| < 60                    | 15               | 10 (50.0) | 5 (31.3)  | 7               | 3 (33.3) | 4 (44.4) |
| Hepatitis               |                  |           |           |                 |          |          |
| Yes                     | 6                | 2 (10.0)  | 4 (25.0)  | 3               | 1 (11.1) | 2 (22.2) |
| No                      | 30               | 18 (90.0) | 12 (75.0) | 15              | 8 (88.9) | 7 (77.8) |
| ECOG                    |                  |           |           |                 |          |          |
| 0                       | 23               | 15 (75.0) | 8 (50.0)  | 10              | 6 (66.7) | 4 (44.4) |
| 1                       | 12               | 5 (25.0)  | 7 (43.8)  | 7               | 3 (33.3) | 4 (44.4) |
| 2                       | 1                | 0         | 1 (6.2)   | 1               | 0        | 1 (11.1) |
| Child–Pugh              |                  |           |           |                 |          |          |
| A                       | 28               | 17 (85.0) | 11 (68.7) | 13              | 7 (77.8) | 6 (66.7) |
| B                       | 8                | 3 (15.0)  | 5 (31.3)  | 5               | 2 (22.2) | 3 (33.3) |
| Grade                   |                  |           |           |                 |          |          |
| Poor                    | 11               | 7 (35.0)  | 4 (25.0)  | 5               | 3 (33.3) | 2 (22.2) |
| Moderate                | 14               | 8 (40.0)  | 6 (37.5)  | 7               | 4 (44.4) | 3 (33.3) |
| Well                    | 2                | 0         | 2 (12.5)  | 1               | 0        | 1 (11.1) |
| NA                      | 9                | 5 (25.0)  | 4 (25.0)  | 5               | 2 (22.2) | 3 (33.3) |
| TNM stage               |                  |           |           |                 |          |          |
| II                      | 1                | 1 (5.0)   | 0         | 1               | 1 (11.1) | 0        |
| III                     | 19               | 10 (50.0) | 9 (56.3)  | 7               | 4 (44.4) | 3 (33.3) |
| IV                      | 16               | 9 (45.0)  | 7 (43.7)  | 10              | 4 (44.4) | 6 (66.7) |
| Vascular invasion       |                  |           |           |                 |          |          |
| Yes                     | 7                | 3 (15.0)  | 4 (25.0)  | 4               | 2 (22.2) | 2 (22.2) |
| No                      | 29               | 17 (85.0) | 12 (75.0) | 14              | 7 (77.8) | 7 (77.8) |
| Intrahepatic metastasis |                  |           |           |                 |          |          |
| Yes                     | 28               | 17 (85.0) | 11 (68.7) | 13              | 7 (77.8) | 6 (66.7) |
| No                      | 8                | 3 (15.0)  | 5 (31.3)  | 5               | 2 (22.2) | 3 (33.3) |
| Tumor number            |                  |           |           |                 |          |          |

|                     |    |           |            |    |           |           |
|---------------------|----|-----------|------------|----|-----------|-----------|
| 1                   | 4  | 4 (20.0)  | 0          | 0  | 0         | 0         |
| 2                   | 4  | 1 (5.0)   | 3 (18.8)   | 1  | 0         | 1 (11.1)  |
| 3                   | 1  | 0         | 1 (6.2)    | 0  | 0         | 0         |
| >3                  | 16 | 11 (55.0) | 5 (31.3)   | 10 | 7 (77.8)  | 3 (33.3)  |
| NA                  | 11 | 4 (20.0)  | 7 (43.7)   | 7  | 2 (22.2)  | 5 (55.6)  |
| Size <sup>#</sup>   |    |           |            |    |           |           |
| ≥ 5 cm              | 18 | 8 (40.0)  | 10 (62.5)  | 8  | 4 (44.4)  | 4 (44.4)  |
| < 5 cm              | 18 | 12 (60.0) | 6 (37.5)   | 10 | 5 (55.6)  | 5 (55.6)  |
| Alpha fetoprotein   |    |           |            |    |           |           |
| ≥ 20 U/mL           | 2  | 2 (10.0)  | 0          | 1  | 0         | 1 (11.1)  |
| < 20 U/mL           | 33 | 17 (85.0) | 16 (100.0) | 16 | 9 (100.0) | 7 (77.8)  |
| NA                  | 1  | 1 (5.0)   | 0          | 1  | 0         | 1 (11.1)  |
| CA19-9              |    |           |            |    |           |           |
| ≥ 200 U/mL          | 9  | 3 (15.0)  | 6 (37.5)   | 7  | 3 (33.3)  | 4 (44.4)  |
| < 200 U/mL          | 27 | 17 (85.0) | 10 (63.5)  | 11 | 6 (66.7)  | 5 (55.6)  |
| Total bilirubin     |    |           |            |    |           |           |
| ≥ 17 umol/L         | 16 | 10 (50.0) | 6 (37.5)   | 8  | 3 (33.3)  | 5 (55.6)  |
| < 17 umol/L         | 20 | 10 (50.0) | 10 (63.5)  | 10 | 6 (66.7)  | 4 (44.4)  |
| Direct bilirubin    |    |           |            |    |           |           |
| ≥ 7 umol/L          | 14 | 6 (30.0)  | 8 (50.0)   | 3  | 3 (33.3)  | 0         |
| < 7 umol/L          | 22 | 14 (70.0) | 8 (50.0)   | 15 | 6 (66.7)  | 9 (100.0) |
| Bile acids          |    |           |            |    |           |           |
| ≥ 10 umol/L         | 14 | 8 (40.0)  | 6 (37.5)   | 5  | 2 (22.2)  | 3 (33.3)  |
| < 10 umol/L         | 19 | 9 (45.0)  | 10 (63.5)  | 13 | 7 (77.8)  | 6 (66.7)  |
| NA                  | 3  | 3 (15.0)  | 0          | 0  | 0         | 0         |
| Therapeutic regimen |    |           |            |    |           |           |
| IM+MTT              | 32 | 17 (85.0) | 15 (93.8)  | 16 | 8 (88.9)  | 8 (88.9)  |
| IM+MTT+CHEMO        | 4  | 3 (15.0)  | 1 (6.2)    | 2  | 1 (11.1)  | 1 (11.1)  |

<sup>#</sup>Maximum tumor diameter. DCB, durable clinical benefit; NDB, non-durable clinical benefit; ICC, intrahepatic cholangiocarcinoma; GBC, gallbladder cancer; ECC, extrahepatic cholangiocarcinoma; ECOG, Eastern Cooperative Oncology Group; TNM, tumor node metastasis; CA19-9, Carbohydrate antigen 19-9; IM, immunotherapy; MTT, molecular targeted therapy; CHEMO, chemotherapy.

**Supplementary Table S15. The performances of all prediction models by Random Forest Analysis.**

| <b>Features</b>                                                                                                                                                                                    |                                                                                                                                                  |                                                                                                                                                              |
|----------------------------------------------------------------------------------------------------------------------------------------------------------------------------------------------------|--------------------------------------------------------------------------------------------------------------------------------------------------|--------------------------------------------------------------------------------------------------------------------------------------------------------------|
| <b>Model 1</b> (microbiome)                                                                                                                                                                        | <b>Model 2</b> (metabolome)                                                                                                                      | <b>Model 3</b> (microbiome + metabolome)                                                                                                                     |
| s__Anaeroglobus_geminatus<br>s__Streptococcus_anginosus<br>s__Olsenella_profusa<br>s__Alistipes_putredinis<br>s__Isoptricola_variabilis<br>s__Candidatus_Nanosynsacchari_sp_T<br>M7_ANC_38_39_G1_1 | 4-[(Hydroxymethyl)nitrosoamino]-1-(3-pyridinyl)-1-butanone<br>Tryptamine<br>Pyrrolidine<br>4-(2,6,6-Trimethyl-1,3-cyclohexadien-1-yl)-2-butanone | s__Anaeroglobus_geminatus<br>s__Olsenella_profusa<br>4-[(Hydroxymethyl)nitrosoamino]-1-(3-pyridinyl)-1-butanone<br>s__Streptococcus_anginosus<br>Pyrrolidine |
| Train set:<br>AUC = 89.69% (95% CI :78.87%-100%)                                                                                                                                                   | Train set:<br>AUC = 86.25% (95% CI :74.38%-98.12%)                                                                                               | Train set:<br>AUC = 95.94% (95% CI :90.41%-100%)                                                                                                             |
| Test set:<br>AUC = 72.22% (95% CI: 45.86%-98.58%)                                                                                                                                                  | Test set:<br>AUC = 75.31% (95% CI: 50.81%-99.81%)                                                                                                | Test set:<br>AUC = 83.95% (95% CI: 61.81%-100%)                                                                                                              |

**Supplementary Table S16. Differential kegg pathways for metagenomic sequencing**

| Item                                             | DCB_fre | NDB_fre | DCB_mean    | NDB_mean    | wilcox_pvalue | BH-pvalue   | FDR-pvalue  | Enriched_group | LDA_score   | LEfSe_pvalue |
|--------------------------------------------------|---------|---------|-------------|-------------|---------------|-------------|-------------|----------------|-------------|--------------|
| ko00020:Citrate cycle (TCA cycle)                | 0.979   | 0.976   | 0.014229438 | 0.011586999 | 0.007527481   | 0.217928265 | 0.217928265 | DCB            | 3.17610888  | 0.007434167  |
| ko00600:Sphingolipid metabolism                  | 0.915   | 0.756   | 0.006379065 | 0.004435629 | 0.039219957   | 0.439676356 | 0.439676356 | DCB            | 2.98214803  | 0.038822583  |
| ko00630:Glyoxylate and dicarboxylate metabolism  | 1       | 1       | 0.011178131 | 0.009968329 | 0.006895996   | 0.217928265 | 0.217928265 | DCB            | 2.870111188 | 0.006809744  |
| ko02048:Prokaryotic defense system               | 1       | 1       | 0.006820711 | 0.005623393 | 0.046500819   | 0.459193691 | 0.459193691 | DCB            | 2.858410926 | 0.046042757  |
| ko00051:Fructose and mannose metabolism          | 1       | 1       | 0.010895851 | 0.009712205 | 0.022395862   | 0.31902622  | 0.31902622  | DCB            | 2.79835793  | 0.022151001  |
| ko00650:Butanoate metabolism                     | 1       | 1       | 0.006836289 | 0.005909694 | 0.047428456   | 0.459193691 | 0.459193691 | DCB            | 2.795768    | 0.046962711  |
| ko00195:Photosynthesis                           | 0.106   | 0       | 0.001396203 | 0           | 0.033452775   | 0.419143591 | 0.419143591 | DCB            | 2.788735122 | 0.03259545   |
| ko00541:O-Antigen nucleotide sugar biosynthesis  | 0.979   | 0.976   | 0.005568622 | 0.004580192 | 0.017719553   | 0.31902622  | 0.31902622  | DCB            | 2.757267953 | 0.017520003  |
| ko00680:Methane metabolism                       | 0.936   | 0.927   | 0.006736464 | 0.005927476 | 0.004165087   | 0.217928265 | 0.217928265 | DCB            | 2.664875727 | 0.00411039   |
| ko00260:Glycine, serine and threonine metabolism | 1       | 1       | 0.013256977 | 0.012479112 | 0.045588501   | 0.459193691 | 0.459193691 | DCB            | 2.644306323 | 0.045138027  |
| ko00190:Oxidative phosphorylation                | 1       | 1       | 0.008396517 | 0.007680165 | 0.007071449   | 0.217928265 | 0.217928265 | DCB            | 2.605523147 | 0.006983228  |
| ko00998:Biosynthesis of various antibiotics      | 0.915   | 0.854   | 0.002075595 | 0.001399512 | 0.019959875   | 0.31902622  | 0.31902622  | DCB            | 2.566792724 | 0.019738246  |
| ko03051:Proteasome                               | 0.702   | 0.829   | 0.000326334 | 0.000624178 | 0.022466635   | 0.31902622  | 0.31902622  | NDB            | 2.444576291 | 0.022219427  |
| ko03009:Ribosome biogenesis                      | 1       | 1       | 0.006023241 | 0.006408655 | 0.019173537   | 0.31902622  | 0.31902622  | NDB            | 2.455231369 | 0.018959716  |
| ko01002:Peptidases and inhibitors                | 1       | 1       | 0.00217992  | 0.002378499 | 0.027811269   | 0.370237522 | 0.370237522 | NDB            | 2.506083805 | 0.027515854  |
| ko00627:Aminobenzoate degradation                | 0.83    | 0.927   | 0.000646542 | 0.0010073   | 0.010403926   | 0.246226254 | 0.246226254 | NDB            | 2.535890911 | 0.010279183  |
| ko00760:Nicotinate and nicotinamide metabolism   | 1       | 1       | 0.006363157 | 0.006893063 | 0.005627288   | 0.217928265 | 0.217928265 | NDB            | 2.620465727 | 0.005555474  |
| ko02010:ABC transporters                         | 0.894   | 0.951   | 0.004910835 | 0.00592759  | 0.035721911   | 0.422709278 | 0.422709278 | NDB            | 2.752265737 | 0.03535558   |
| ko00230:Purine metabolism                        | 1       | 1       | 0.010942973 | 0.01194609  | 0.005484487   | 0.217928265 | 0.217928265 | NDB            | 2.785608587 | 0.00541432   |

---

|                                    |       |       |             |             |             |             |             |     |             |             |
|------------------------------------|-------|-------|-------------|-------------|-------------|-------------|-------------|-----|-------------|-------------|
| ko02024:Quorum sensing             | 0.809 | 0.878 | 0.004559577 | 0.005687844 | 0.020024323 | 0.31902622  | 0.31902622  | NDB | 2.786303663 | 0.019801786 |
| ko00552:Teichoic acid biosynthesis | 0.957 | 0.951 | 0.00410935  | 0.005526724 | 0.001137745 | 0.217928265 | 0.217928265 | NDB | 2.877803792 | 0.001121107 |
| ko00194:Photosynthesis proteins    | 0.574 | 0.805 | 0.003023476 | 0.00471478  | 0.008185099 | 0.217928265 | 0.217928265 | NDB | 2.961995177 | 0.008082859 |

---



**Supplementary Table S17. Differential metacyc pathways for metagenomic sequencing**

| Item                                                                  | DCB_fre | NDB_fre | DCB_me<br>an    | NDB_me<br>an    | wilcox.pv<br>alue | BH-pvalu<br>e   | FDR-pvalu<br>ue | Enriched_g<br>roup | LDA_sco<br>re   | LEfSe_pv<br>alue |
|-----------------------------------------------------------------------|---------|---------|-----------------|-----------------|-------------------|-----------------|-----------------|--------------------|-----------------|------------------|
| PANTO-PWY: phosphopantothenate biosynthesis I                         | 1       | 1       | 0.006420<br>781 | 0.005119<br>213 | 0.008416<br>03    | 0.231861<br>63  | 0.231861<br>63  | DCB                | 2.836695<br>212 | 0.0083129<br>02  |
| PANTOSYN-PWY: pantothenate and coenzyme A biosynthesis I              | 1       | 1       | 0.006574<br>306 | 0.005413<br>787 | 0.034320<br>108   | 0.366857<br>283 | 0.366857<br>283 | DCB                | 2.793839<br>865 | 0.0339661<br>85  |
| HISDEG-PWY: L-histidine degradation I                                 | 1       | 1       | 0.003805<br>878 | 0.002689<br>273 | 0.020961<br>314   | 0.308502<br>995 | 0.308502<br>995 | DCB                | 2.768764<br>174 | 0.0207301<br>76  |
| PWY-6703: preQ0 biosynthesis                                          | 1       | 1       | 0.004761<br>182 | 0.003764<br>06  | 0.040425<br>731   | 0.390782<br>063 | 0.390782<br>063 | DCB                | 2.757857<br>755 | 0.0400188<br>18  |
| PWY-5030: L-histidine degradation III                                 | 1       | 1       | 0.003124<br>531 | 0.001952<br>181 | 0.007250<br>901   | 0.231861<br>63  | 0.231861<br>63  | DCB                | 2.757710<br>43  | 0.0071606<br>7   |
| THISYN-PWY: superpathway of thiamin diphosphate biosynthesis I        | 1       | 1       | 0.005110<br>072 | 0.004070<br>651 | 0.005484<br>487   | 0.231861<br>63  | 0.231861<br>63  | DCB                | 2.743624<br>116 | 0.0054143<br>2   |
| 1CMET2-PWY: N10-formyl-tetrahydrofolate biosynthesis                  | 1       | 1       | 0.007660<br>39  | 0.006824<br>214 | 0.041250<br>087   | 0.391875<br>828 | 0.391875<br>828 | DCB                | 2.668587<br>124 | 0.0408361<br>46  |
| PWY-7663: gondoate biosynthesis (anaerobic)                           | 1       | 1       | 0.006425<br>854 | 0.005709<br>712 | 0.006232<br>637   | 0.231861<br>63  | 0.231861<br>63  | DCB                | 2.634827<br>044 | 0.0061538<br>9   |
| ARGININE-SYN4-PWY: L-ornithine de novo biosynthesis                   | 1       | 1       | 0.003154<br>731 | 0.002288<br>602 | 0.027223<br>149   | 0.357141<br>786 | 0.357141<br>786 | DCB                | 2.615958<br>852 | 0.0269331<br>35  |
| NAGLIPASYN-PWY: lipid IVA biosynthesis                                | 1       | 1       | 0.002604<br>236 | 0.001858<br>626 | 0.006895<br>996   | 0.231861<br>63  | 0.231861<br>63  | DCB                | 2.576743<br>753 | 0.0068097<br>44  |
| ASPASN-PWY: superpathway of L-aspartate and L-asparagine biosynthesis | 1       | 1       | 0.004848<br>145 | 0.004173<br>82  | 0.012092<br>434   | 0.302860<br>5   | 0.302860<br>5   | DCB                | 2.560549<br>939 | 0.0119499<br>87  |
| PWY-6892: thiazole biosynthesis I (E. coli)                           | 1       | 1       | 0.004674        | 0.004173        | 0.042941          | 0.392488        | 0.392488        | DCB                | 2.343244        | 0.0425132        |

|                                                                                                  |       |       |          |          |          |          |          |     |          |           |
|--------------------------------------------------------------------------------------------------|-------|-------|----------|----------|----------|----------|----------|-----|----------|-----------|
|                                                                                                  |       |       | 412      | 834      | 569      | 5        | 5        |     | 312      | 95        |
| PWY-7332: superpathway of UDP-N-acetylglucosamine-derived O-antigen building blocks biosynthesis | 0.894 | 0.878 | 0.000674 | 0.000410 | 0.044981 | 0.392488 | 0.392488 | DCB | 2.142271 | 0.0445362 |
|                                                                                                  |       |       | 764      | 168      | 987      | 5        | 5        |     | 089      | 53        |
| PWY-5508: adenosylcobalamin biosynthesis from cobyrinate a,c-diamide II                          | 0     | 0.098 | 0        | 7.10E-06 | 0.030240 | 0.362229 | 0.362229 | NDB | 2.039177 | 0.0293678 |
|                                                                                                  |       |       |          |          | 563      | 356      | 356      |     | 105      | 68        |
| PWY-5430: meta cleavage pathway of aromatic compounds                                            | 0.021 | 0.146 | 5.06E-07 | 4.46E-06 | 0.032419 | 0.365599 | 0.365599 | NDB | 2.054348 | 0.0317046 |
|                                                                                                  |       |       |          |          | 389      | 887      | 887      |     | 591      | 69        |
| LACTOSECAT-PWY: lactose and galactose degradation I                                              | 1     | 0.976 | 0.000314 | 0.000525 | 0.035767 | 0.371846 | 0.371846 | NDB | 2.059906 | 0.0354008 |
|                                                                                                  |       |       | 752      | 356      | 482      | 843      | 843      |     | 746      | 43        |
| PWY-6138: CMP-N-acetylneuraminate biosynthesis I (eukaryotes)                                    | 0.043 | 0.22  | 2.53E-06 | 7.98E-06 | 0.017639 | 0.308502 | 0.308502 | NDB | 2.063096 | 0.0172946 |
|                                                                                                  |       |       |          |          | 349      | 995      | 995      |     | 208      | 82        |
| PWY-7003: glycerol degradation to butanol                                                        | 0.915 | 0.976 | 0.000529 | 0.000722 | 0.029006 | 0.362229 | 0.362229 | NDB | 2.089968 | 0.0286999 |
|                                                                                                  |       |       | 502      | 548      | 289      | 356      | 356      |     | 442      | 32        |
| ARGORNPROST-PWY: arginine, ornithine and proline interconversion                                 | 0.957 | 0.976 | 0.000195 | 0.000429 | 0.000161 | 0.044511 | 0.044511 | NDB | 2.090876 | 0.0001588 |
|                                                                                                  |       |       | 301      | 286      | 565      | 255      | 255      |     | 951      | 77        |
| PWY-5182: toluene degradation II (aerobic) (via 4-methylcatechol)                                | 0.234 | 0.512 | 0.000230 | 0.000478 | 0.007588 | 0.231861 | 0.231861 | NDB | 2.168853 | 0.0074799 |
|                                                                                                  |       |       | 593      |          | 952      | 63       | 63       |     | 336      | 53        |
| PWY-5265: peptidoglycan biosynthesis II (staphylococci)                                          | 0.553 | 0.756 | 0.000155 | 0.000391 | 0.034621 | 0.366857 | 0.366857 | NDB | 2.176514 | 0.0342571 |
|                                                                                                  |       |       | 793      | 861      | 74       | 283      | 283      |     | 883      | 43        |
| PWY-5180: toluene degradation I (aerobic) (via o-cresol)                                         | 0.234 | 0.512 | 0.000230 | 0.000478 | 0.007588 | 0.231861 | 0.231861 | NDB | 2.182196 | 0.0074799 |
|                                                                                                  |       |       | 593      |          | 952      | 63       | 63       |     | 259      | 53        |
| PWY-6595: superpathway of guanosine nucleotides degradation (plants)                             | 0.915 | 0.976 | 0.000278 | 0.000550 | 0.013914 | 0.306675 | 0.306675 | NDB | 2.185295 | 0.0137531 |
|                                                                                                  |       |       | 696      | 244      | 494      | 45       | 45       |     | 19       | 86        |
| PWY-6549: L-glutamine biosynthesis III                                                           | 1     | 1     | 0.000952 | 0.001250 | 0.019173 | 0.308502 | 0.308502 | NDB | 2.193010 | 0.0189597 |
|                                                                                                  |       |       | 994      | 765      | 537      | 995      | 995      |     | 418      | 16        |
| P185-PWY: formaldehyde assimilation III (dihydroxyacetone cycle)                                 | 1     | 1     | 0.000613 | 0.000847 | 0.042088 | 0.392488 | 0.392488 | NDB | 2.220590 | 0.0416675 |

|                                                                                |       |       |          |          |          |          |          |     |          |           |
|--------------------------------------------------------------------------------|-------|-------|----------|----------|----------|----------|----------|-----|----------|-----------|
|                                                                                |       |       | 57       | 446      | 638      | 5        | 5        |     | 149      | 77        |
| PWY-7198: pyrimidine deoxyribonucleotides de novo biosynthesis IV              | 1     | 1     | 0.001756 | 0.002236 | 0.022395 | 0.308502 | 0.308502 | NDB | 2.358191 | 0.0221510 |
|                                                                                |       |       | 589      | 859      | 862      | 995      | 995      |     | 913      | 01        |
| PWY-5121: superpathway of geranylgeranyl diphosphate biosynthesis II (via MEP) | 0.894 | 0.951 | 0.000605 | 0.001020 | 0.013578 | 0.306675 | 0.306675 | NDB | 2.368703 | 0.0134207 |
|                                                                                |       |       | 07       | 562      | 68       | 45       | 45       |     | 168      | 94        |
| PWY-622: starch biosynthesis                                                   | 0.66  | 0.805 | 0.000556 | 0.001048 | 0.032512 | 0.365599 | 0.365599 | NDB | 2.410362 | 0.0321711 |
|                                                                                |       |       | 115      | 511      | 513      | 887      | 887      |     | 813      | 56        |
| PWY-6901: superpathway of glucose and xylose degradation                       | 1     | 1     | 0.003036 | 0.003510 | 0.020961 | 0.308502 | 0.308502 | NDB | 2.433147 | 0.0207301 |
|                                                                                |       |       | 791      | 92       | 314      | 995      | 995      |     | 322      | 76        |
| PENTOSE-P-PWY: pentose phosphate pathway                                       | 1     | 1     | 0.003345 | 0.003949 | 0.028410 | 0.362229 | 0.362229 | NDB | 2.484869 | 0.0281094 |
|                                                                                |       |       | 842      | 228      | 312      | 356      | 356      |     | 203      | 15        |
| PWY-7560: methylerythritol phosphate pathway II                                | 0.894 | 0.951 | 0.000884 | 0.001505 | 0.015250 | 0.308502 | 0.308502 | NDB | 2.513604 | 0.0150751 |
|                                                                                |       |       | 763      | 403      | 047      | 995      | 995      |     | 574      | 24        |
| PWY-6270: isoprene biosynthesis I                                              | 0.894 | 0.951 | 0.000833 | 0.001461 | 0.018718 | 0.308502 | 0.308502 | NDB | 2.525180 | 0.0185093 |
|                                                                                |       |       | 456      | 223      | 796      | 995      | 995      |     | 808      | 69        |
| PWY-6527: stachyose degradation                                                | 1     | 1     | 0.003599 | 0.004169 | 0.045588 | 0.392488 | 0.392488 | NDB | 2.526825 | 0.0451380 |
|                                                                                |       |       | 956      | 432      | 501      | 5        | 5        |     | 004      | 27        |
| NONOXIPENT-PWY: pentose phosphate pathway (non-oxidative branch)               | 1     | 1     | 0.006022 | 0.006662 | 0.049330 | 0.408097 | 0.408097 | NDB | 2.533281 | 0.0488490 |
|                                                                                |       |       | 162      | 556      | 457      | 966      | 966      |     | 526      | 56        |
| P124-PWY: Bifidobacterium shunt                                                | 0.766 | 0.854 | 0.000541 | 0.001259 | 0.017511 | 0.308502 | 0.308502 | NDB | 2.564950 | 0.0173134 |
|                                                                                |       |       | 69       | 965      | 669      | 995      | 995      |     | 616      | 66        |
| METSYN-PWY: L-homoserine and L-methionine biosynthesis                         | 1     | 1     | 0.003198 | 0.003871 | 0.039615 | 0.389787 | 0.389787 | NDB | 2.573597 | 0.0392154 |
|                                                                                |       |       | 867      | 853      | 385      | 094      | 094      |     | 41       | 1         |
| PWY0-781: aspartate superpathway                                               | 1     | 1     | 0.001976 | 0.002697 | 0.017127 | 0.308502 | 0.308502 | NDB | 2.595906 | 0.0169336 |
|                                                                                |       |       | 888      | 779      | 296      | 995      | 995      |     | 379      | 13        |
| MET-SAM-PWY: superpathway of S-adenosyl-L-methionine biosynthesis              | 1     | 1     | 0.003243 | 0.003978 | 0.020501 | 0.308502 | 0.308502 | NDB | 2.610870 | 0.0202745 |

|                                                                |       |       |          |          |          |          |          |     |          |           |
|----------------------------------------------------------------|-------|-------|----------|----------|----------|----------|----------|-----|----------|-----------|
|                                                                |       |       | 114      | 214      | 262      | 995      | 995      |     | 841      | 56        |
| PWY66-400: glycolysis VI (metazoan)                            | 1     | 1     | 0.004071 | 0.004883 | 0.029641 | 0.362229 | 0.362229 | NDB | 2.617789 | 0.0293297 |
|                                                                |       |       | 177      | 171      | 809      | 356      | 356      |     | 792      | 08        |
| PYRIDNUCSAL-PWY: NAD salvage pathway I                         | 0.979 | 0.976 | 0.001605 | 0.002400 | 0.008312 | 0.231861 | 0.231861 | NDB | 2.621794 | 0.0082106 |
|                                                                |       |       | 966      | 527      | 617      | 63       | 63       |     | 552      | 24        |
| NONMEVIPP-PWY: methylerythritol phosphate pathway I            | 0.894 | 0.951 | 0.001442 | 0.002320 | 0.014560 | 0.308502 | 0.308502 | NDB | 2.666459 | 0.0143929 |
|                                                                |       |       | 46       | 242      | 913      | 995      | 995      |     | 011      | 79        |
| PWY-6471: peptidoglycan biosynthesis IV (Enterococcus faecium) | 1     | 0.951 | 0.001437 | 0.002226 | 0.026078 | 0.350468 | 0.350468 | NDB | 2.669848 | 0.0257989 |
|                                                                |       |       | 87       | 051      | 385      | 053      | 053      |     | 777      | 44        |
| PWY-2941: L-lysine biosynthesis II                             | 1     | 1     | 0.001886 | 0.003048 | 0.001396 | 0.096192 | 0.096192 | NDB | 2.723441 | 0.0013765 |
|                                                                |       |       | 978      | 469      | 625      | 521      | 521      |     | 082      | 18        |
| OANTIGEN-PWY: O-antigen building blocks biosynthesis (E. coli) | 1     | 1     | 0.003379 | 0.004460 | 0.000772 | 0.060767 | 0.060767 | NDB | 2.730931 | 0.0007603 |
|                                                                |       |       | 6        | 783      |          | 44       | 44       |     | 799      | 87        |
| UDPNAGSYN-PWY: UDP-N-acetyl-D-glucosamine biosynthesis I       | 1     | 1     | 0.002986 | 0.004244 | 0.000442 | 0.044568 | 0.044568 | NDB | 2.807096 | 0.0004358 |
|                                                                |       |       | 43       | 664      | 728      | 589      | 589      |     | 823      | 1         |

**Supplementary Table S18. Enrichment metabolic pathways for differential metabolite annotation**

| Pathway  | Description                                  | CpdRatio | BgRatio | pvalue            | p.adjust          | Compound ID   |
|----------|----------------------------------------------|----------|---------|-------------------|-------------------|---------------|
| hsa00380 | Tryptophan metabolism                        | 2/5      | 13/276  | 7                 | 0.1071203946799   | C00398/C10164 |
| hsa00980 | Metabolism of xenobiotics by cytochrome P450 | 1/5      | 3/276   | 8                 | 0.1071203946799   | C19563        |
| hsa05204 | Chemical carcinogenesis - DNA adducts        | 1/5      | 3/276   | 8                 | 0.1071203946799   | C19563        |
| hsa00260 | Glycine, serine and threonine metabolism     | 1/5      | 15/276  | 0.245355243306174 | 0.301858239084517 | C06231        |
| hsa00240 | Pyrimidine metabolism                        | 1/5      | 17/276  | 0.274046423268892 | 0.301858239084517 | C00178        |
| hsa04080 | Neuroactive ligand-receptor interaction      | 1/5      | 19/276  | 0.301858239084517 | 0.301858239084517 | C00398        |

**Supplementary Table S19. The contribution of different clinical factors to the analysis of CCA based on species**

| tax       | CCA1         | CCA2         | R2          | pvalue   |
|-----------|--------------|--------------|-------------|----------|
| Tsize     | -0.339016834 | -0.940780307 | 0.111883463 | 0.0716   |
| Dbil      | 0.971469622  | 0.237164022  | 0.416194618 | 0.0019   |
| Tbil      | 0.972440883  | 0.233149587  | 0.446192979 | 0.001    |
| Sex       | -0.862065892 | -0.50679621  | 0.057189685 | 0.2965   |
| Age       | 0.402024728  | -0.91562881  | 0.103338454 | 0.0969   |
| TNM       | -0.783118029 | -0.6218731   | 0.029025287 | 0.5423   |
| Response  | 0.446911979  | -0.894577936 | 0.075715174 | 0.1793   |
| ChildPugh | 0.83723051   | -0.546850138 | 0.22707951  | 0.0036   |
| Ecog      | 0.65917563   | -0.751989022 | 0.273546019 | 0.0012   |
| Hepatitis | -0.194621799 | -0.980878359 | 0.316477238 | 4.00E-04 |
| CA199     | 0.998521117  | -0.054365236 | 0.039078958 | 0.1993   |
| IHM       | 0.418743775  | -0.908104427 | 0.084030933 | 0.1468   |
| VI        | -0.407152187 | -0.913360333 | 0.245712846 | 0.0018   |
| BA        | 0.923309947  | -0.384055649 | 0.12290841  | 0.0601   |
| AFP       | 0.566528258  | 0.824042313  | 0.003798911 | 0.761    |
| Treatment | 0.343193943  | -0.939264562 | 0.029696785 | 0.4494   |

**Supplementary Table S20. The contribution of different clinical factors to the analysis of CCA based on 20 survival differential taxa**

| tax       | CCA1         | CCA2         | R2          | pvalue |
|-----------|--------------|--------------|-------------|--------|
| Tsize     | -0.926980809 | -0.375108757 | 0.015614261 | 0.6296 |
| Dbil      | -0.999771091 | -0.021395478 | 0.121631514 | 0.0371 |
| Tbil      | -0.999740949 | -0.022760361 | 0.138300723 | 0.0312 |
| Sex       | 0.433066496  | 0.901361975  | 0.003970429 | 0.9209 |
| Age       | -0.984472314 | 0.175539918  | 0.101951622 | 0.0535 |
| TNM       | 0.661569252  | -0.749884074 | 0.017957177 | 0.5952 |
| Response  | -0.986238878 | -0.165326571 | 0.084366977 | 0.077  |
| ChildPugh | -0.998860774 | 0.047719535  | 0.121290621 | 0.0343 |
| Ecog      | -0.986063602 | 0.166368788  | 0.132818124 | 0.0244 |
| Hepatitis | 0.040075124  | -0.99919667  | 0.188376793 | 0.0058 |
| CA199     | -0.965468636 | -0.260519313 | 0.004452359 | 0.7598 |
| IHM       | -0.957568614 | -0.288205395 | 0.049649165 | 0.2239 |
| VI        | 0.993681396  | 0.112237618  | 0.001507321 | 0.9571 |
| BA        | -0.956003529 | -0.293355163 | 0.134865205 | 0.0313 |
| AFP       | -0.999629059 | 0.027235002  | 0.000376561 | 0.9727 |
| Treatment | -0.934179559 | 0.35680324   | 0.038528496 | 0.31   |

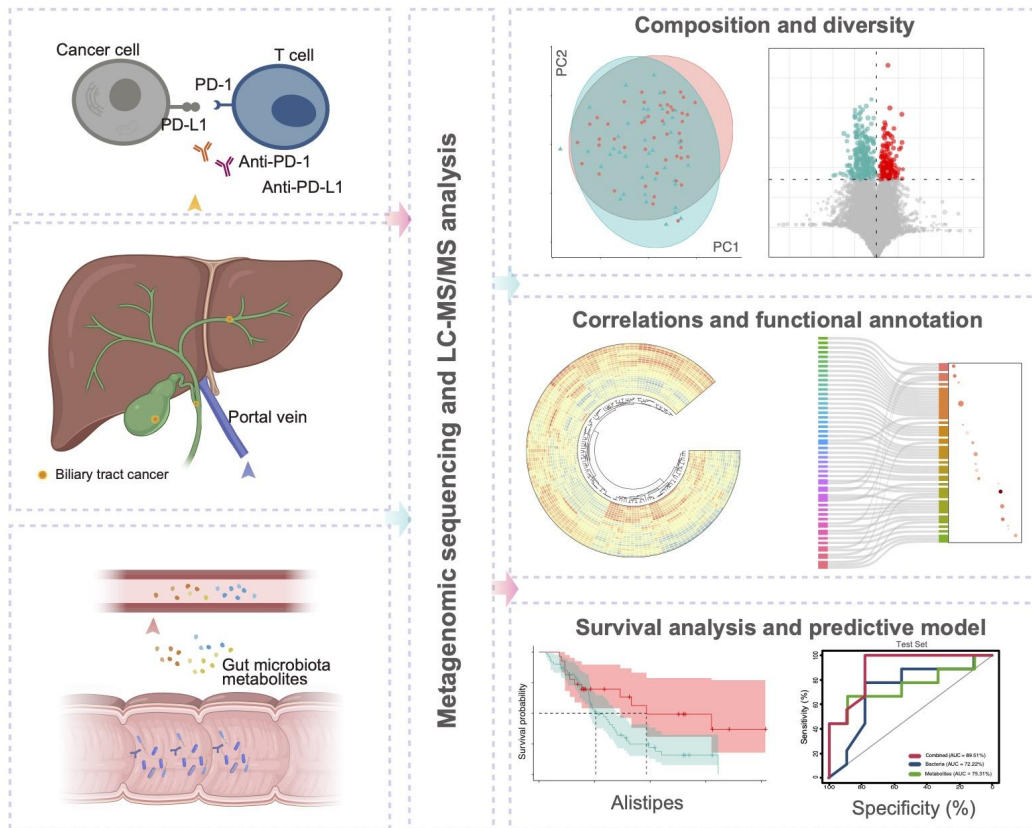

Supplementary Fig. S1. Study workflow



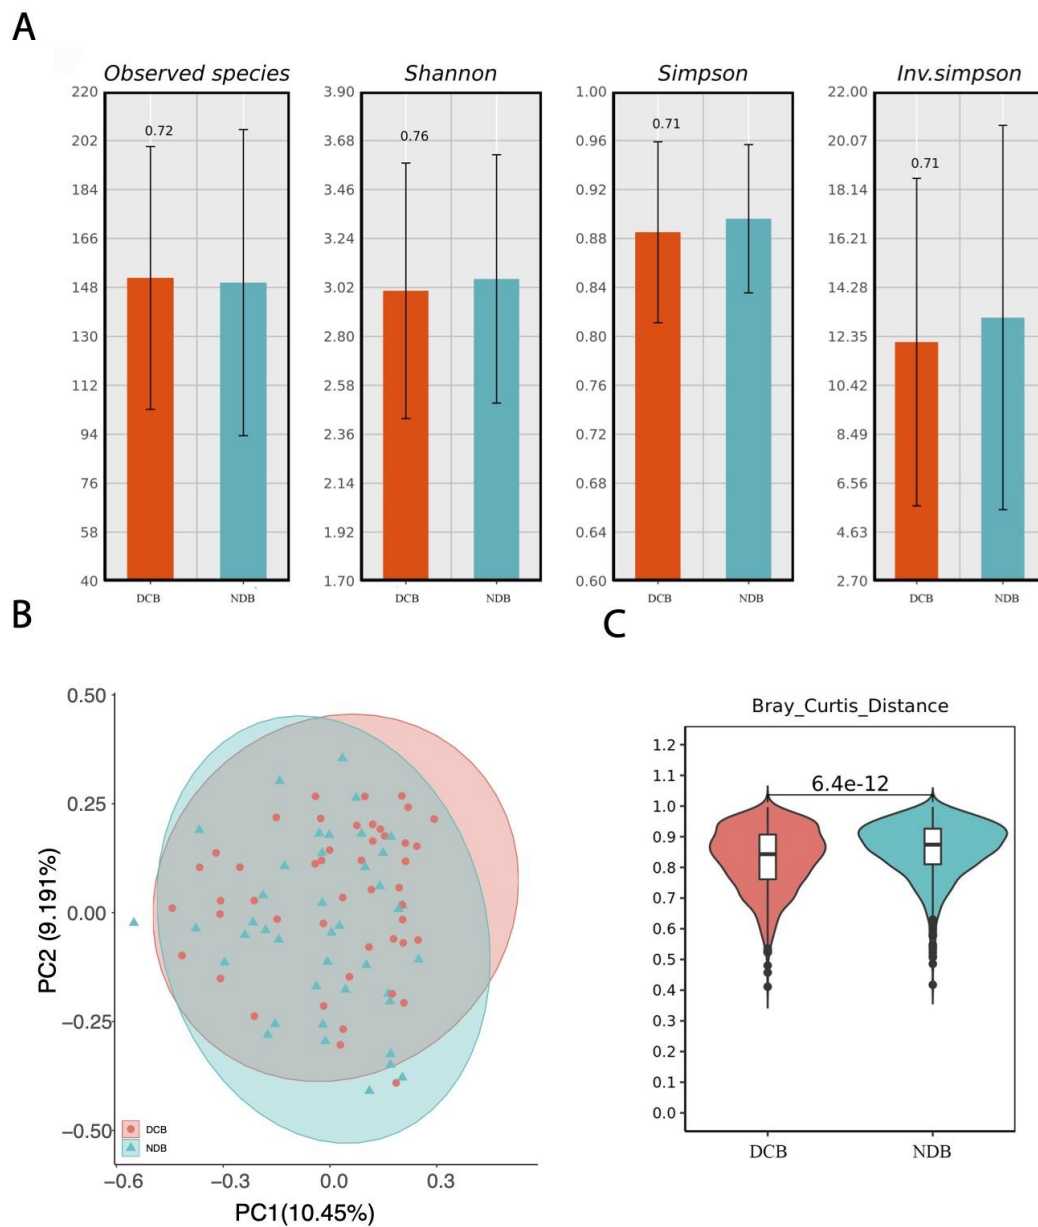

**Supplementary Fig. S2. The alpha diversity and beta diversity between DCB and NDB group based on species.**

(A)Alpha diversity. (B)Principal coordinate analysis (PCoA) of beta diversity measurements by

Bray-Curtis distances. ANOSIM,  $R=0.04$ ,  $P=0.025$ . (C)Beta diversity.

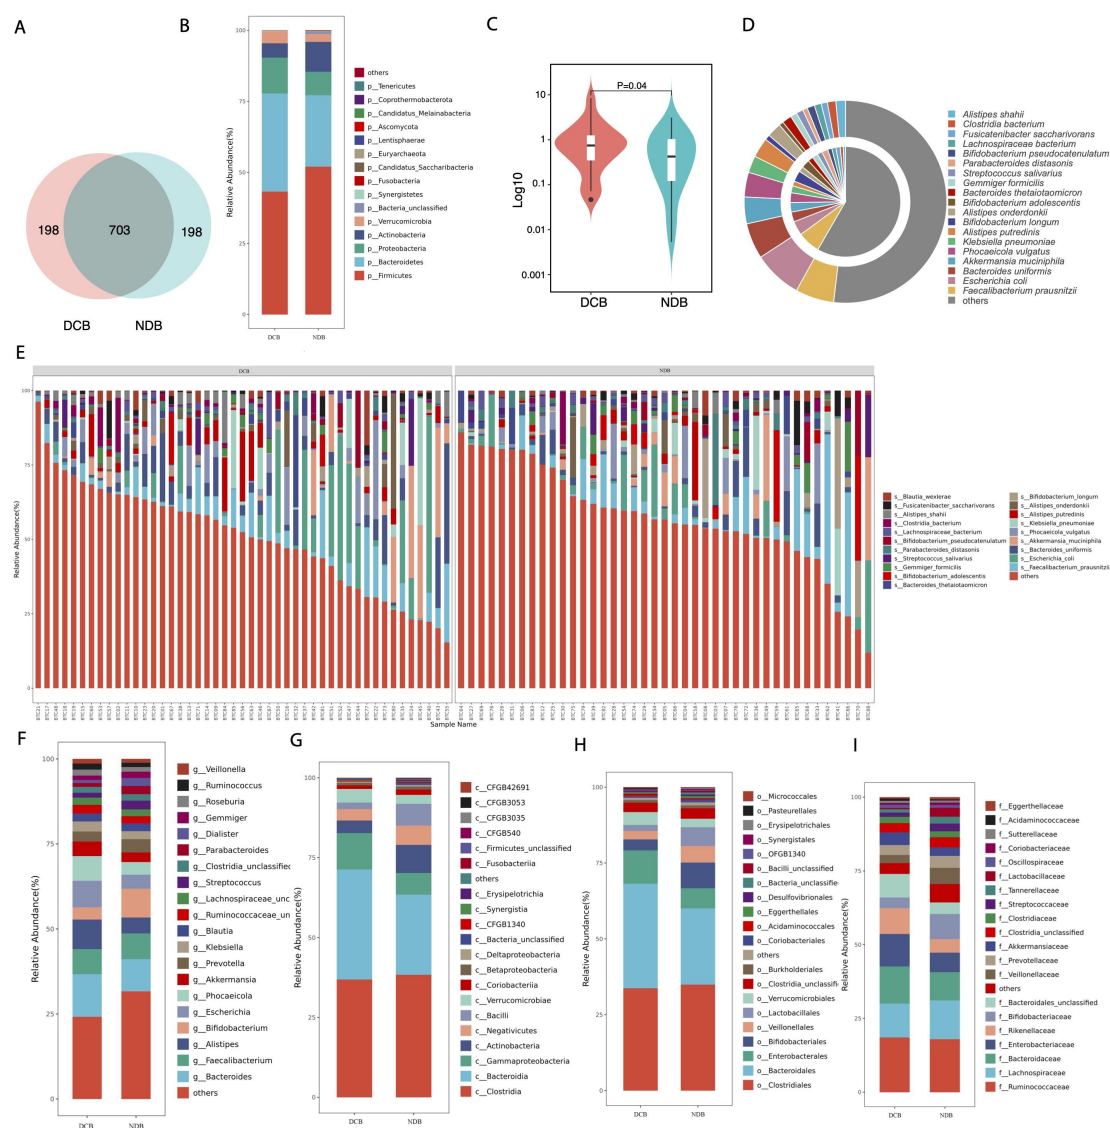

**Supplementary Fig. S3. Gut microbiome composition in the DCB and NDB group.**

(A) Venn diagram of common and unique species. (B) Gut microbiome composition at the phylum level.

(C) *Bacteroidetes*/*Firmicutes* ratio (B/F). (D) Gut microbiome composition at the species level. The

inner circle shows the species belonging to NDB, and the outer circle shows the species belonging to

DCB. (E) The composition of the top 20 species of each baseline sample. Gut microbiome composition

at the genus (F), class (G), order (H), and family (I) level.



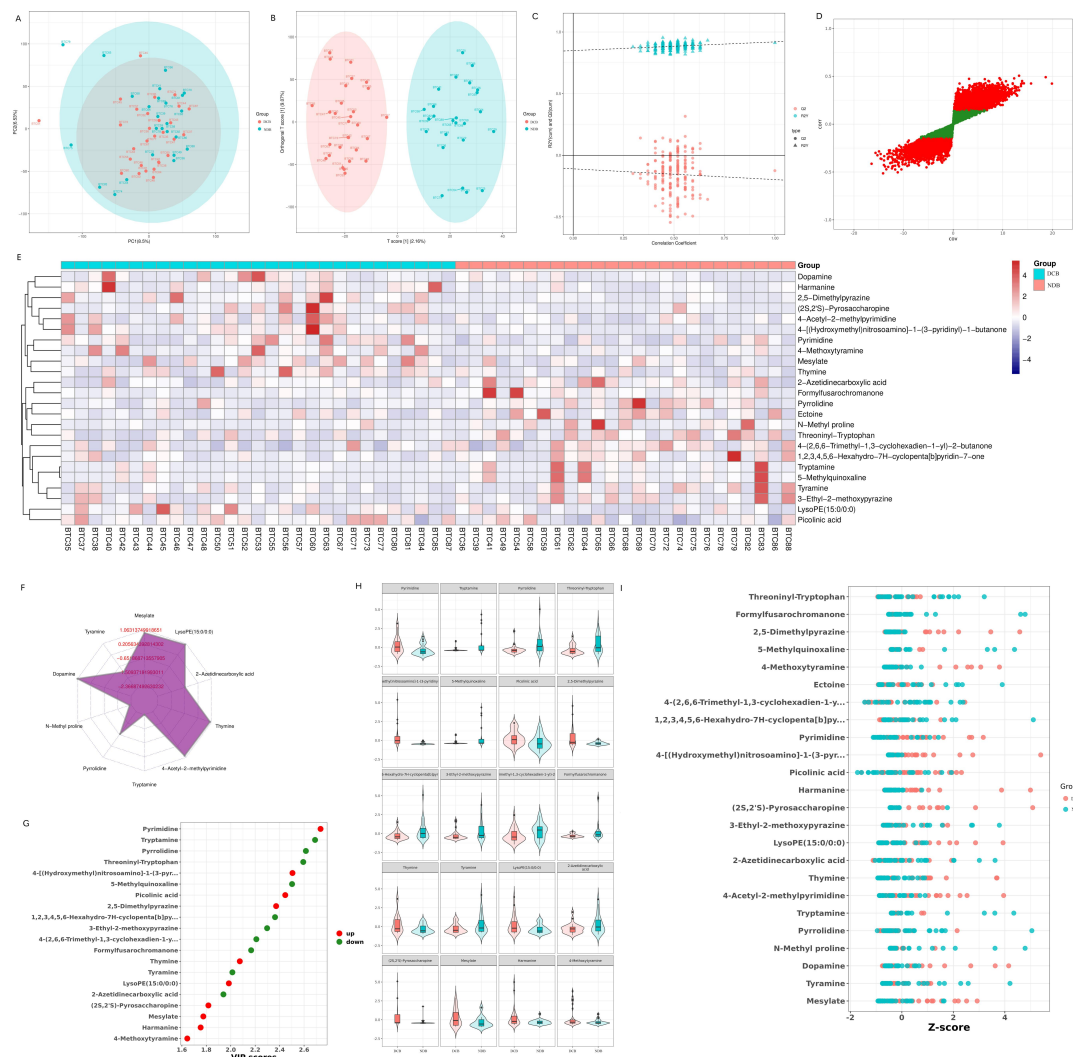

**Supplementary Fig. S5. Differential metabolites for group DCB vs NDB.**

(A) Score scatter plot of PCA. (B) Score scatter plot of OPLS-DA model. (C) Permutation test of OPLS-DA model. (D) OPLS-DA S-plot. (E) Heatmap of hierarchical clustering analysis. (F) Radar chart analysis. (G) VIP scores. (H) Violin Plot of differential metabolites. (I) Z-score of differential metabolites.

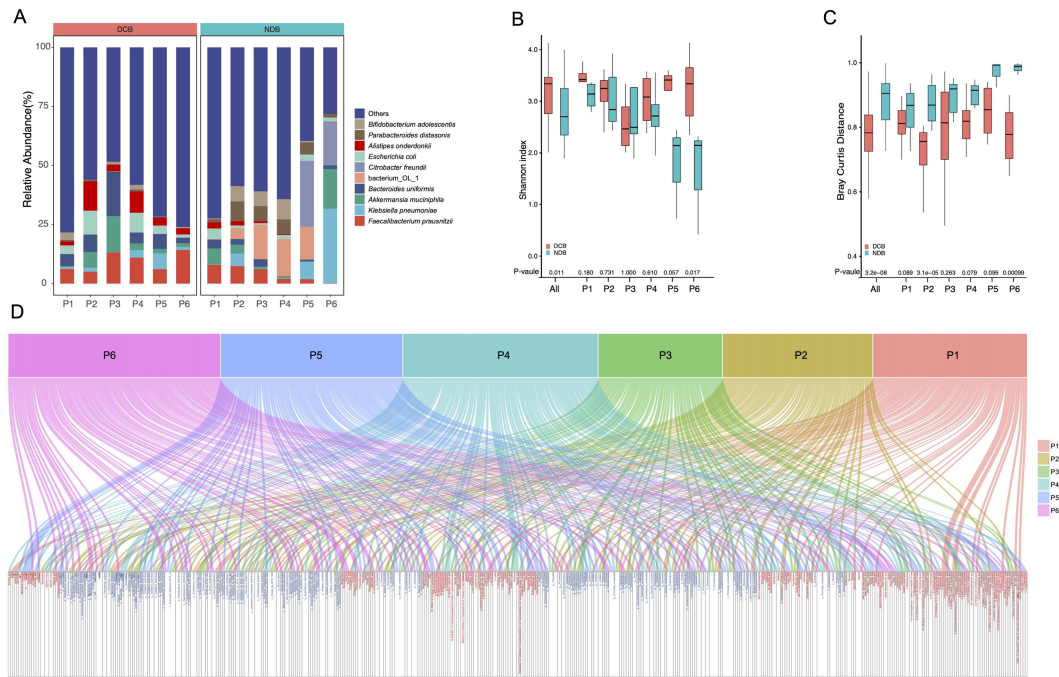

**Supplementary Fig. S6. Dynamic point analysis in DCB and NDB groups.**

(A) Dynamic microbial composition at the species level. (B) Dynamic point alpha diversity based on species\_shannon. (C) Dynamic point beta diversity based on species\_Bray-Curtis distances. (D)

Differential taxa and metabolites from Point 1 to Point 6. Blue font represents differential taxa, and red represents differential metabolites.

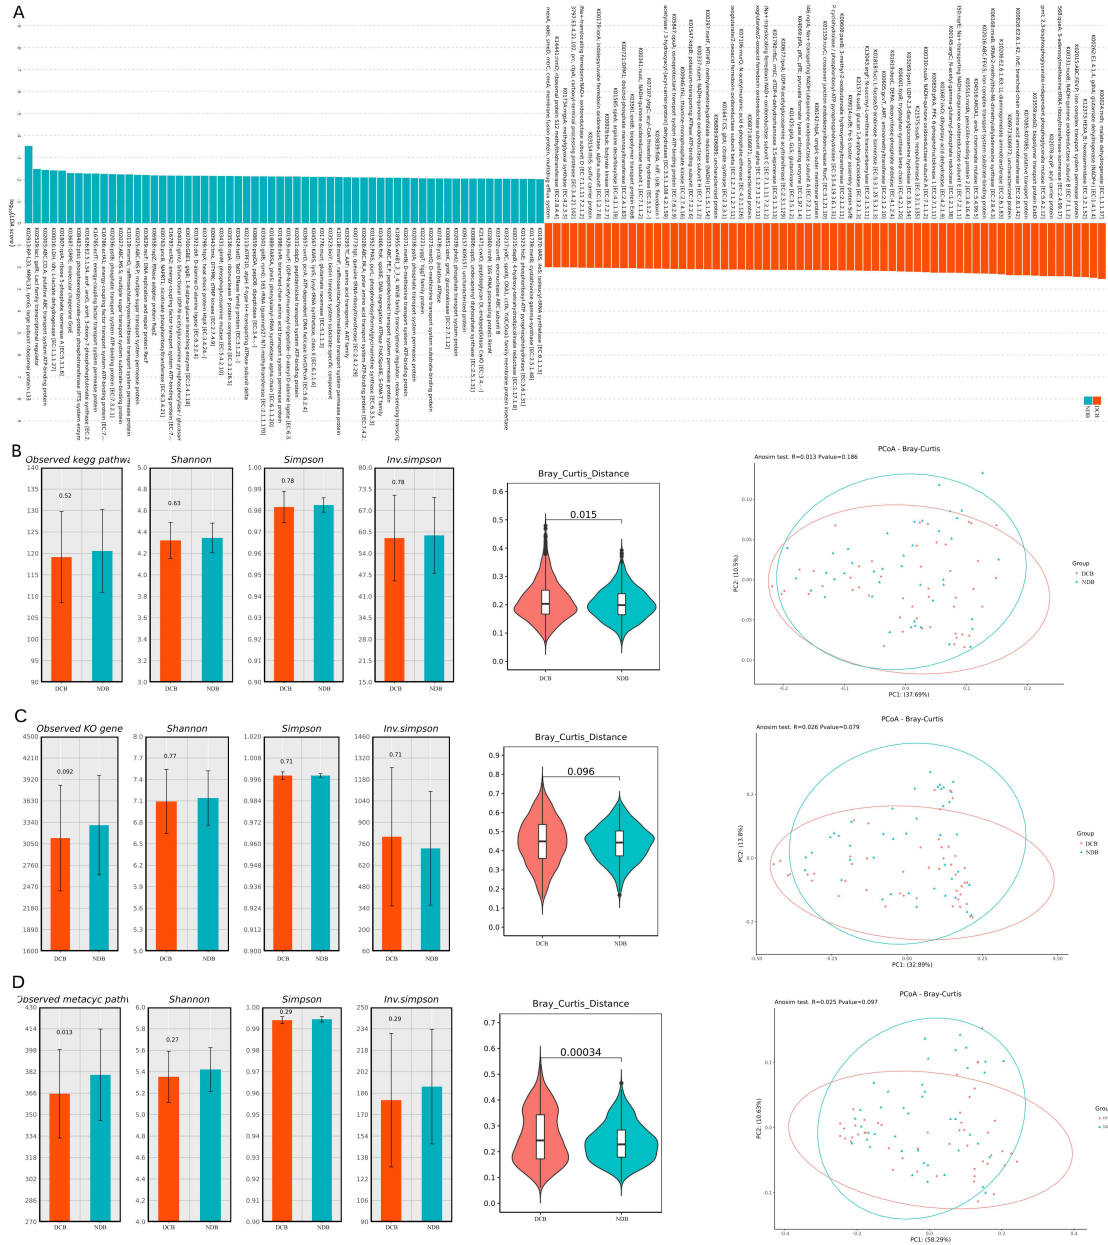

**Supplementary Fig. S7. Functional annotation of metagenomic and metabolomics.**

(A) Significantly different KO genes in the DCB and NDB group. The alpha diversity and beta diversity between DCB and NDB group based on Kegg pathway (B), ko gene (C), and metabolic pathway (D).



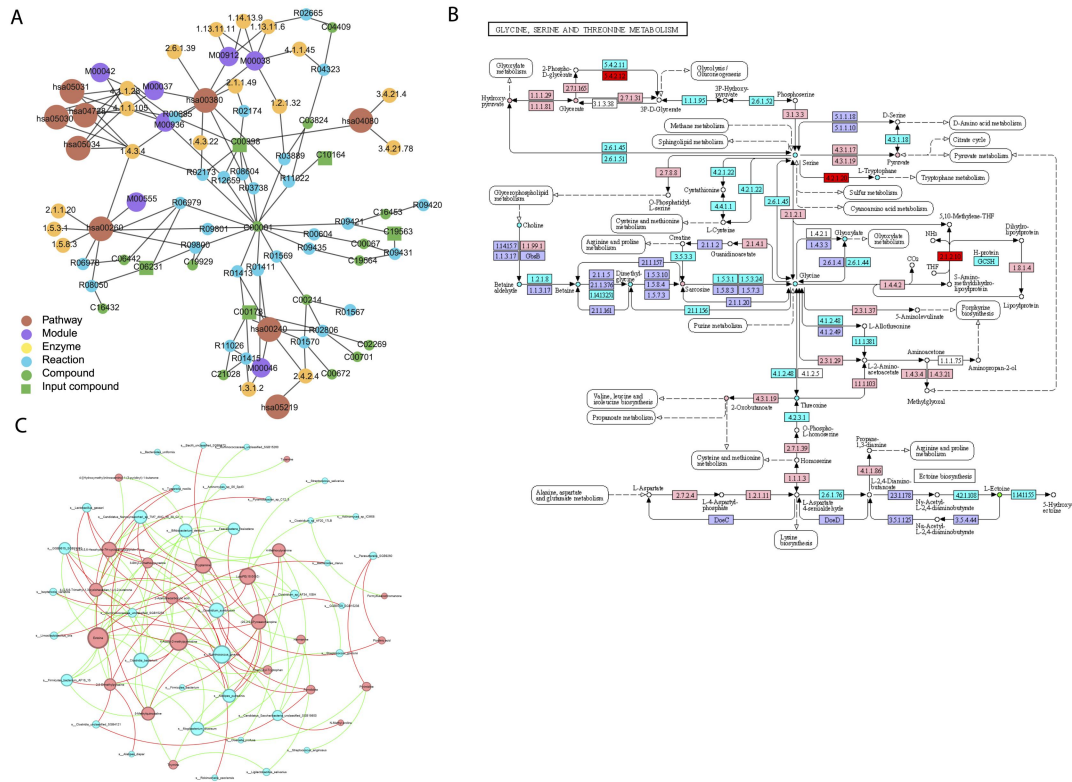

**Supplementary Fig. S8. Correlations between microbes and metabolites.**

(A) Cooccurrence network of enrichment metabolic pathways by LC-MS/MS analysis. (B) KO00260 pathway co-plotted the differential KO gene and metabolites. Red indicates that the DCB group is significantly higher than the NDB group; green indicates that it is significantly lower in the DCB group than in the NDB group; pink indicates that it was higher in the DCB group than in the NDB group but not significant; bright green indicates that the DCB group is lower than the NDB group but not significant. (C) Correlations analysis of all differential species and differential metabolites.

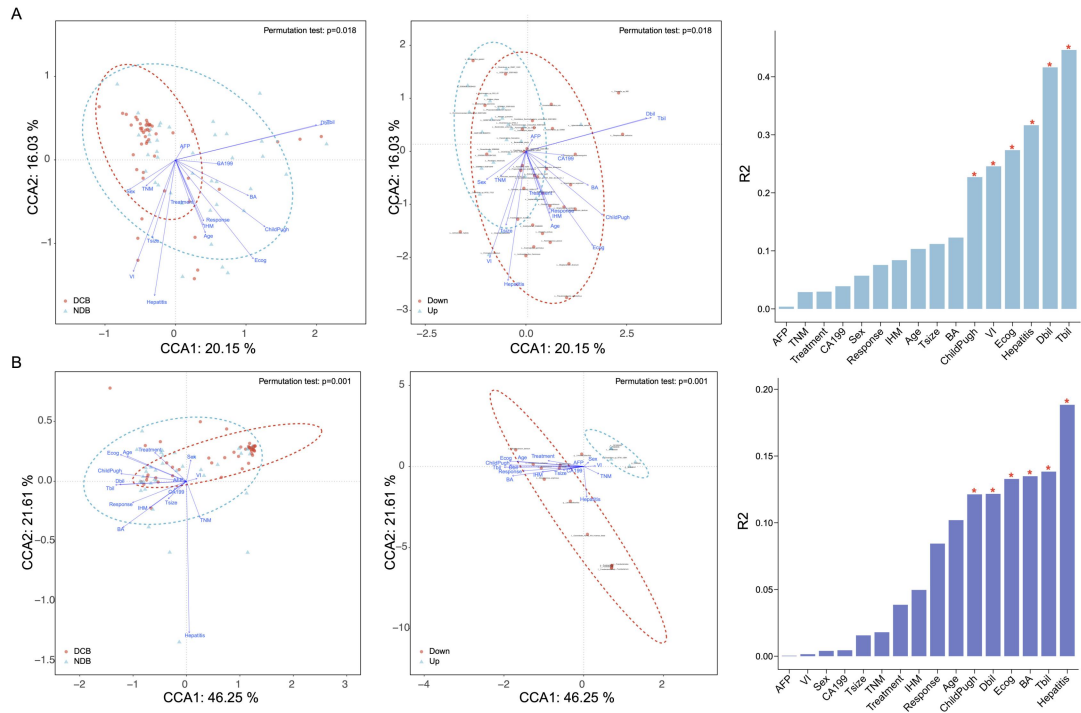

**Supplementary Fig. S9. Gut microbiome distribution was affected by clinical factors.**

Canonical correspondence analysis (CCA) with permutation test showed the clinical factors associated with the distribution of patients with BTC, the different species enriched in the DCB and NDB group, and contribution of different clinical factors to CCA for all differential taxa (A) and survival differential taxa (B). \* $P<0.05$ .



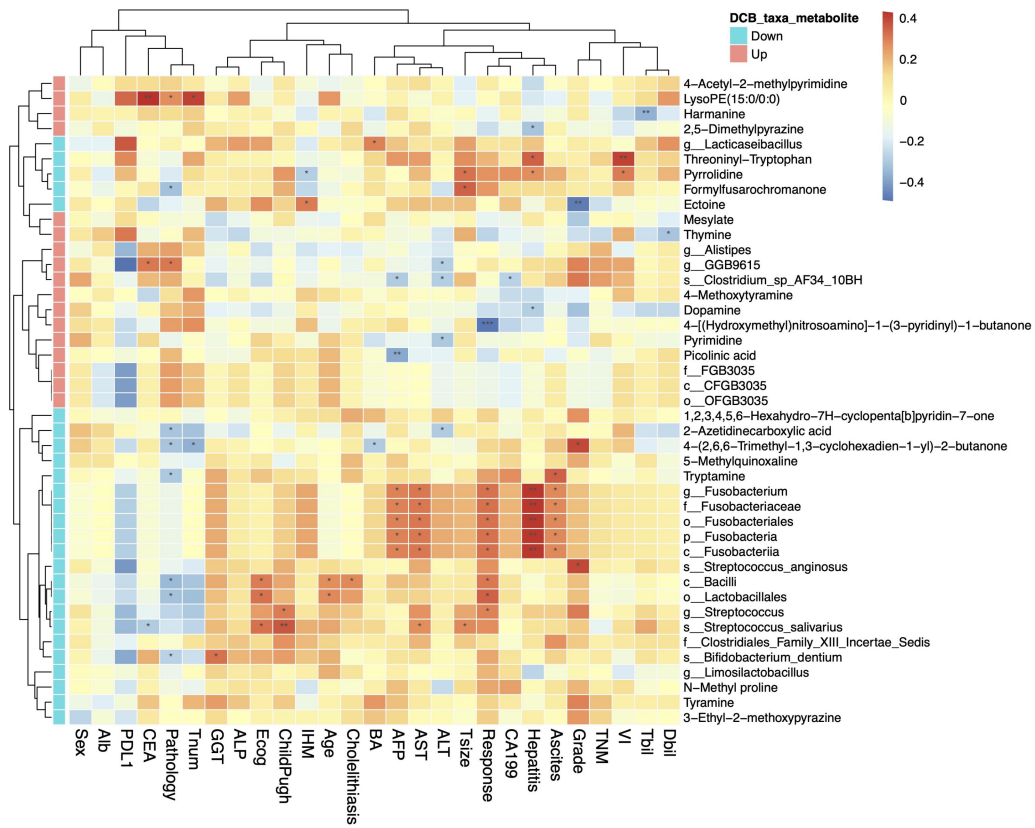

Supplementary Fig. S10. Correlations of clinical factors with differential metabolites and survival associated differentially taxa (Spearman's rank correlation with two-tailed P values). \*P < 0.05; \*\*P < 0.01; \*\*\*P < 0.001.

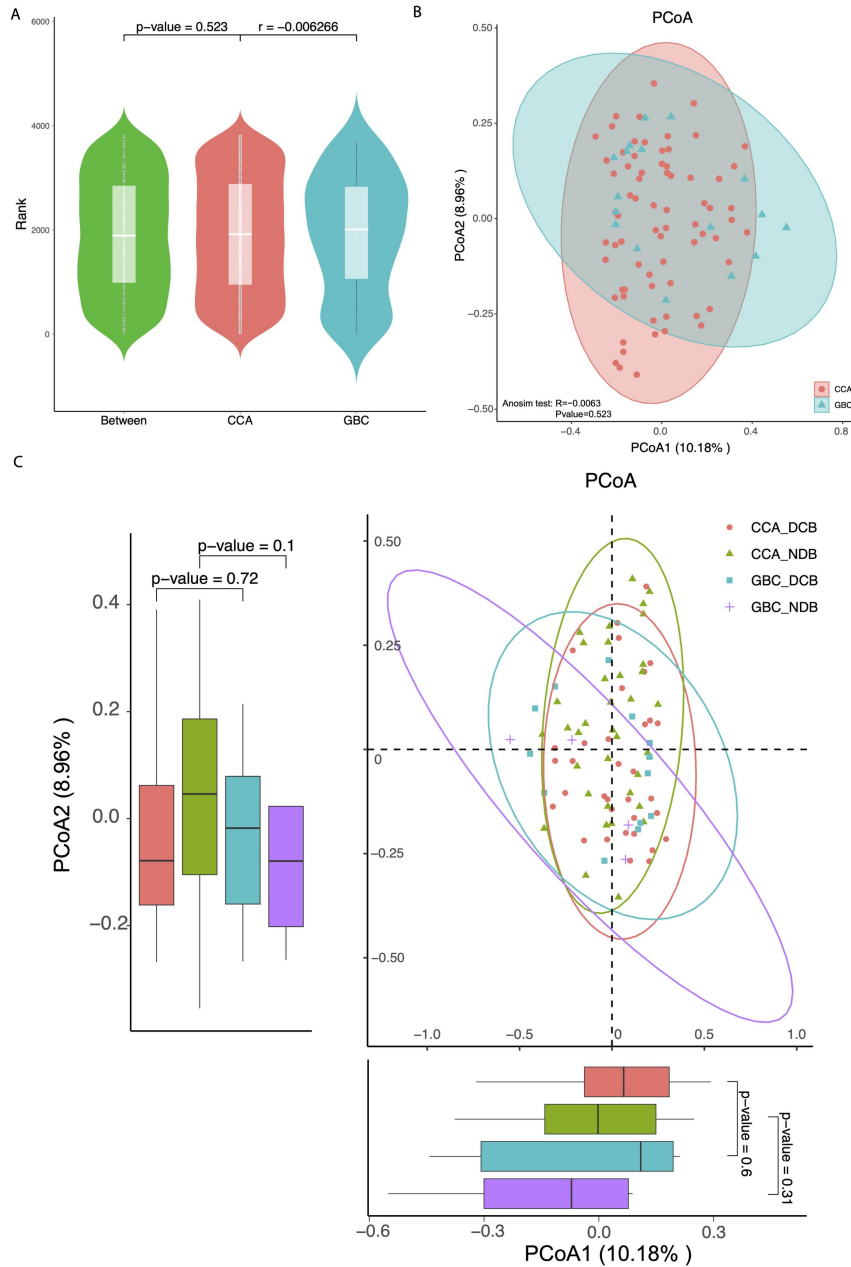

**Supplementary Fig. S11. Comparison of intergroup differences between cholangiocarcinoma and gallbladder cancer.**

(A-B) Principal Coordinate analysis (PCoA) based on Bray-Curtis distances between cholangiocarcinoma (CCA) and gallbladder cancer (GBC) groups. (C) Comparison of PCoA between the four groups (CCA\_DCB, CCA\_NDB, GBC\_DCB, and GBC\_NDB).

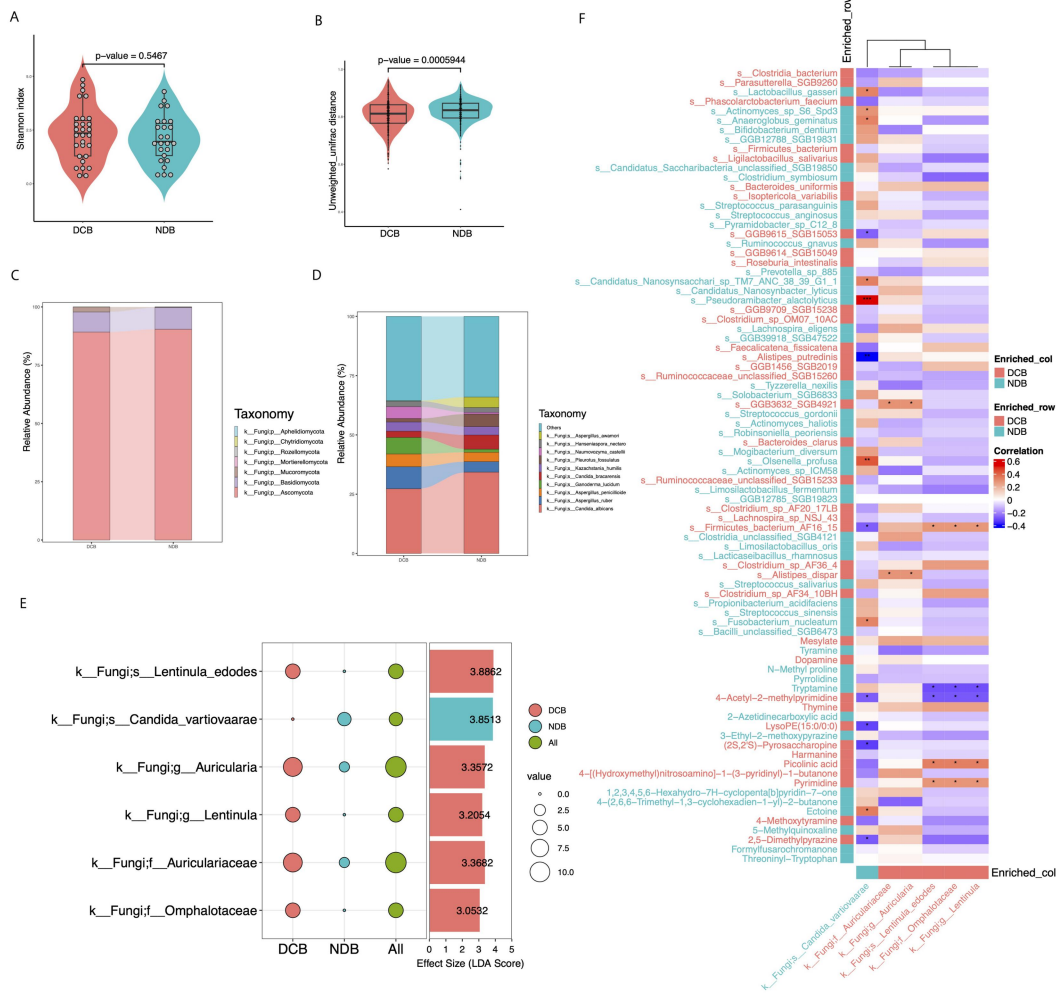

Supplementary Fig. S12. The differences between the DCB and NDB groups based on gut fungi.

(A) alpha diversity. (B) Beta diversity. (C) Significantly different fungi. (D) Association analysis of differential fungi with differential bacteria and metabolites.
